# Supplementary material for: Evidence of Pathogen-Induced Immunogenetic Selection across the Large Geographic Range of a Wild Seabird
Source: PubMed Central journal article supplement (PMC7253215; doi:10.1093/molbev/msaa040), 2020-02-25
Supplement: msaa040_supplementary_information.pdf [file msaa040_supplementary_information.pdf]

# Evidence of pathogen-induced immunogenetic selection across the large geographic range of a wild seabird

## Supplementary Information

**Supplementary Table S1.** Polymorphisms and diversity indices for fourteen colonies of Gentoo penguin at three toll-like receptor loci and the mitochondrial hypervariable control region. (CR = Crozet Island; MAR = Marion Island; COU = Courbet Peninsula, Kerguelen; MO = Pointe du Morne, Kerguelen; CB = Cow Bay, Falkland/Malvinas Islands; BR = Bull Roads, Falkland/Malvinas Islands; BI = Bird Island, South Georgia; MT = Martillo Island, Tierra del Fuego; SIG = Signy Island, South Orkney Islands; COP = Copacabana (Admiralty Bay), King George Island, South Shetland Islands; SP = Stranger Point, King George Island, South Shetland Islands; BO = Bernardo O'Higgins Base, Western Antarctic Peninsula; GGV = Gabriel González Videla Base, Western Antarctic Peninsula; JP = Jougla Point, Western Antarctic Peninsula).

| Locus       | Colony (N) | S  | H             | $H_d$ (SD)      | $\pi$ (SD) ( $\times 10^{-4}$ ) | UPV   | AR       | D         | $F_S$     |
|-------------|------------|----|---------------|-----------------|---------------------------------|-------|----------|-----------|-----------|
| <b>TLR4</b> | CR (7)     | 5  | 4             | 0.6593 (0.1203) | 5.86 (1.9)                      | 3     | 3.802    | -0.17122  | 0.48000   |
|             | MAR (8)    | 5  | 4             | 0.7667 (0.0573) | 9.80 (1.2)                      | 4     | 3.858    | 2.17212*  | 2.06630   |
|             | COU (7)    | 8  | 7             | 0.6923 (0.1366) | 8.32 (2.4)                      | 4     | 5.286    | -0.59171  | -1.89341  |
|             | MO (15)    | 9  | 14            | 0.9034 (0.0362) | 11.01 (0.8)                     | 8     | 7.033    | 0.73200   | -5.86857* |
|             | CB (19)    | 2  | 2             | 0.0526 (0.0492) | 0.41 (0.4)                      | 1     | 1.263    | -1.49106* | -0.61060  |
|             | BR (7)     | 0  | 1             | 0               | 0                               | 1     | 1.000    | 0         | 0         |
|             | BI (18)    | 0  | 1             | 0               | 0                               | 1     | 1.000    | 0         | 0         |
|             | MT (5)     | 0  | 1             | 0               | 0                               | 1     | 1.000    | 0         | 0         |
|             | SIG (5)    | 4  | 3             | 0.5111 (0.1643) | 6.01 (2.3)                      | 1     | 3.000    | 0.32418   | 1.35813   |
|             | COP (22)   | 5  | 5             | 0.6342 (0.0511) | 7.46 (0.7)                      | 1     | 3.246    | 1.63019   | 1.71487   |
|             | SP (5)     | 4  | 3             | 0.5111 (0.1643) | 6.45 (2.1)                      | 1     | 3.000    | 0.62589   | 1.51568   |
|             | BO (6)     | 5  | 3             | 0.5455 (0.1436) | 5.94 (2.3)                      | 2     | 2.970    | -0.31291  | 1.59874   |
|             | GGV (7)    | 4  | 2             | 0.2637 (0.1360) | 4.14 (2.1)                      | 1     | 1.934    | -0.53129  | 2.69666   |
|             | JP (24)    | 4  | 3             | 0.0824 (0.0541) | 1.12 (0.7)                      | 1     | 1.417    | -1.56204* | -0.73409  |
| Total (155) | 13         | 21 | 0.478 (0.035) | 6.1 (0.5)       | 9                               | 3.446 | -0.58350 | -10.018   |           |
| <b>TLR5</b> | CR (7)     | 1  | 2             | 0.4396 (0.1120) | 1.66 (0.4)                      | 2     | 1.999    | 0.84228   | 0.94377   |
|             | MAR (8)    | 1  | 2             | 0.1250 (0.1064) | 0.47 (0.4)                      | 2     | 1.625    | -1.16221  | -0.70010  |
|             | COU (7)    | 15 | 8             | 0.8571 (0.0774) | 16.09 (2.9)                     | 7     | 6.275    | -0.40117  | -0.88654  |
|             | MO (20)    | 13 | 17            | 0.8731 (0.0415) | 12.30 (1.3)                     | 14    | 6.697    | 0.19907   | -6.77889* |
|             | CB (18)    | 11 | 17            | 0.9159 (0.0309) | 17.10 (0.7)                     | 12    | 7.380    | 2.17976   | -4.88768  |
|             | BR (7)     | 9  | 6             | 0.7692 (0.0895) | 16.09 (1.9)                     | 5     | 4.856    | 1.92919   | 1.04846   |
|             | BI (12)    | 5  | 5             | 0.4928 (0.1165) | 5.25 (1.6)                      | 4     | 2.883    | 0.10549   | -0.03412  |
|             | MT (5)     | 9  | 6             | 0.8444 (0.1029) | 15.72 (2.9)                     | 5     | 6.000    | 1.34084   | -0.04600  |
|             | SIG (5)    | 5  | 3             | 0.5111 (0.1643) | 4.37 (2.3)                      | 3     | 3.000    | -1.38818  | 0.76172   |
|             | COP (21)   | 6  | 6             | 0.6527 (0.0485) | 4.54 (1.0)                      | 6     | 3.462    | -0.36633  | -0.68391  |
|             | SP (5)     | 1  | 2             | 0.2000 (0.1541) | 0.76 (0.6)                      | 2     | 2.000    | -1.11173  | -0.33931  |
|             | BO (6)     | 5  | 3             | 0.3182 (0.1637) | 3.15 (2.1)                      | 3     | 2.667    | -1.83094* | 0.32487   |
|             | GGV (7)    | 2  | 3             | 0.3846 (0.1494) | 1.54 (0.6)                      | 3     | 2.648    | -0.95919  | -0.85452  |
|             | JP (24)    | 1  | 2             | 0.1197 (0.0612) | 0.45 (0.2)                      | 2     | 1.512    | -0.63670  | -0.38233  |
| Total (152) | 20         | 46 | 0.781 (0.022) | 14.8 (0.6)      | 32                              | 5.600 | 0.59898  | -23.918   |           |

|             |             |    |    |                 |              |   |       |          |           |
|-------------|-------------|----|----|-----------------|--------------|---|-------|----------|-----------|
| <b>TLR7</b> | CR (7)      | 0  | 1  | 0               | 0            | 1 | 1.000 | 0        | 0         |
|             | MAR (8)     | 0  | 1  | 0               | 0            | 1 | 1.000 | 0        | 0         |
|             | COU (7)     | 3  | 4  | 0.4945 (0.1506) | 2.32 (0.8)   | 4 | 2.978 | -0.70770 | -1.11799  |
|             | MO (18)     | 2  | 3  | 0.3381 (0.0919) | 1.13 (0.3)   | 2 | 2.275 | -0.51702 | -0.49065  |
|             | CB (17)     | 1  | 2  | 0.0588 (0.0546) | 0.19 (0.2)   | 2 | 1.235 | -1.13783 | -1.31506  |
|             | BR (7)      | 1  | 2  | 0.3626 (0.1302) | 1.16 (0.4)   | 2 | 1.945 | 0.32440  | 0.64281   |
|             | BI (13)     | 0  | 1  | 0               | 0            | 1 | 1.000 | 0        | 0         |
|             | MT (4)      | 1  | 2  | 0.4286 (0.1687) | 1.37 (0.5)   | 2 | 2.000 | 0.33350  | 0.53626   |
|             | SIG (5)     | 2  | 3  | 0.6000 (0.1305) | 2.13 (0.6)   | 2 | 2.800 | -0.18393 | -0.27178  |
|             | COP (21)    | 3  | 4  | 0.3751 (0.0902) | 1.30 (0.3)   | 3 | 2.413 | -0.90151 | -1.43643  |
|             | SP (5)      | 1  | 2  | 0.4667 (0.1318) | 1.49 (0.4)   | 1 | 2.000 | 0.81980  | 0.81801   |
|             | BO (6)      | 2  | 3  | 0.4394 (0.1581) | 1.50 (0.6)   | 2 | 2.576 | -0.84971 | -0.72455  |
|             | GGV (7)     | 2  | 3  | 0.3846 (0.1494) | 1.30 (0.5)   | 2 | 2.407 | -0.95919 | -0.85452  |
|             | JP (23)     | 4  | 5  | 0.3826 (0.0881) | 1.34 (0.3)   | 4 | 2.510 | -1.25133 | -2.59143  |
|             | Total (148) | 9  | 10 | 0.296 (0.034)   | 1.0 (0.1)    | 8 | 2.140 | -1.67798 | -9.379    |
| <b>HVR1</b> | CR (7)      | 8  | 4  | 0.8570 (0.102)  | 123.5 (33.0) | - | -     | 0.10944  | 0.87029   |
|             | MAR (8)     | 5  | 4  | 0.7860 (0.113)  | 68.8 (20.5)  | - | -     | -0.16751 | 0.00547   |
|             | COU (2)     | 0  | 1  | 0               | 0            | - | -     | 0        | 0         |
|             | MO (20)     | 28 | 16 | 0.9580 (0.033)  | 173.2 (10.0) | - | -     | -0.93073 | -7.01213* |
|             | CB (16)     | 12 | 10 | 0.9000 (0.062)  | 116.4 (15.4) | - | -     | -0.50145 | -3.57558  |
|             | BR (7)      | 5  | 4  | 0.8570 (0.102)  | 77.6 (18.5)  | - | -     | 0.13210  | -0.04242  |
|             | BI (17)     | 9  | 8  | 0.8820 (0.047)  | 78.2 (13.8)  | - | -     | -0.75716 | -3.70741* |
|             | MT (5)      | 4  | 2  | 0.6000 (0.175)  | 88.9 (26.0)  | - | -     | 1.64070  | 3.02249   |
|             | SIG (5)     | 6  | 5  | 1.0000 (0.126)  | 103.7 (18.8) | - | -     | -0.19092 | -2.37061* |
|             | COP (21)    | 22 | 15 | 0.9670 (0.024)  | 151.4 (18.9) | - | -     | -1.27487 | -6.15999* |
|             | SP (6)      | 16 | 6  | 1.0000 (0.096)  | 227.2 (34.2) | - | -     | -0.77134 | -1.77289  |
|             | JP (24)     | 18 | 15 | 0.9420 (0.031)  | 127.2 (18.6) | - | -     | -1.03686 | -7.42519* |
|             | Total (138) | 90 | 79 | 0.986 (0.003)   | 744.3 (56.6) | - | -     | 0.53097  | -22.196   |

$S$  = number of polymorphic sites

$H$  = number of haplotypes

$H_d$  = haplotype diversity (standard deviation)

$\pi$  = nucleotide diversity

UPV = unique protein variants of translated haplotypes

AR = allelic richness, adjusted for sample size differences

$D$  = Tajima's  $D$  test statistic, with \* indicating  $p < 0.05$

$F_s$  = Fu's  $F_s$  test statistic, with \* indicating  $p < 0.02$

**Supplementary Table S2.** Pairwise  $F_{ST}$  values (Weir and Cockerham 1984) derived from haplotype frequencies (below diagonal), and pairwise  $\Phi_{ST}$  values of genetic distance (above the diagonal), calculated using the Tamura and Nei substitution model (Tamura and Nei 1993), with associated p-values, among Gentoo penguin breeding sites based on toll-like receptor sequence data (tables S2A-C). mtDNA hypervariable region I  $\Phi_{ST}$  values were calculated using the Kimura 2-Parameter (K80) substitution model (Kimura 1980) with a gamma of 0.27 (table S2D). Comparisons that are significant <0.01 after correction for multiple tests using (SGOF+) are shown in bold (Carvajal-Rodriguez and de Uña-Alvarez 2011).

S2A. *TLR4*

| Colony                                                      | CR                          | MAR                         | COU                         | MO                          | CB                          | BR                          | BI                          | MT                          | SIG                         | COP                         | SP                          | BO                          | GGV                         | JP                          |
|-------------------------------------------------------------|-----------------------------|-----------------------------|-----------------------------|-----------------------------|-----------------------------|-----------------------------|-----------------------------|-----------------------------|-----------------------------|-----------------------------|-----------------------------|-----------------------------|-----------------------------|-----------------------------|
| <b>Crozet Island (CR)</b>                                   | *                           | 0.04120<br>(0.17969)        | 0.43041<br><b>(0.00079)</b> | 0.16276<br>(0.01178)        | 0.84905<br><b>(0.00000)</b> | 0.78209<br><b>(0.00010)</b> | 0.87027<br><b>(0.00000)</b> | 0.75072<br><b>(0.00000)</b> | 0.54200<br><b>(0.00010)</b> | 0.40124<br><b>(0.00000)</b> | 0.48925<br><b>(0.00109)</b> | 0.55826<br><b>(0.00000)</b> | 0.60966<br><b>(0.00010)</b> | 0.82233<br><b>(0.00000)</b> |
| <b>Marion Island (MAR)</b>                                  | 0.00110<br>(0.40541)        | *                           | 0.20483<br>(0.01475)        | 0.0153<br>(0.24453)         | 0.66826<br><b>(0.00000)</b> | 0.54644<br><b>(0.00000)</b> | 0.69000<br><b>(0.00000)</b> | 0.50219<br><b>(0.00158)</b> | 0.31652<br>(0.01049)        | 0.25797<br><b>(0.00400)</b> | 0.26514<br>(0.01416)        | 0.33837<br><b>(0.00446)</b> | 0.38119<br><b>(0.00228)</b> | 0.65266<br><b>(0.00000)</b> |
| <b>Courbet Peninsula (COU)</b>                              | 0.24738<br><b>(0.00158)</b> | 0.13006<br>(0.14950)        | *                           | 0.04851<br>(0.10870)        | 0.21641<br><b>(0.00485)</b> | 0.12661<br>(0.04010)        | 0.25919<br><b>(0.00030)</b> | 0.08874<br>(0.10603)        | 0.00000<br>(0.41392)        | 0.06705<br>(0.08405)        | 0.00000<br>(0.50153)        | 0.00000<br>(0.39570)        | 0.00000<br>(0.35739)        | 0.18573<br>(0.00911)        |
| <b>Pointe du Morne (MO)</b>                                 | 0.08383<br>(0.01109)        | 0.01953<br>(0.18993)        | 0.03074<br>(0.10365)        | *                           | 0.39773<br><b>(0.00000)</b> | 0.30278<br><b>(0.00050)</b> | 0.41555<br><b>(0.00000)</b> | 0.27201<br><b>(0.00307)</b> | 0.13365<br>(0.02901)        | 0.10606<br><b>(0.00505)</b> | 0.08702<br>(0.06831)        | 0.15195<br>(0.01366)        | 0.17420<br>(0.00871)        | 0.39423<br><b>(0.00000)</b> |
| <b>Cow Bay (CB)</b>                                         | 0.71152<br><b>(0.00000)</b> | 0.58202<br><b>(0.00000)</b> | 0.28168<br><b>(0.00069)</b> | 0.38276<br><b>(0.00000)</b> | *                           | 0.00000<br>(0.99990)        | 0.00000<br>(0.99990)        | 0.00000<br>(0.99990)        | 0.30157<br>(0.01139)        | 0.31274<br><b>(0.00010)</b> | 0.34009<br>(0.01257)        | 0.18803<br>(0.01119)        | 0.12601<br>(0.07079)        | 0.00000<br>(0.61390)        |
| <b>Bull Roads (BR)</b>                                      | 0.61538<br><b>(0.00000)</b> | 0.46925<br><b>(0.00000)</b> | 0.19231<br>(0.01554)        | 0.29735<br><b>(0.00000)</b> | 0.00000<br>(0.99990)        | *                           | 0.00000<br>(0.99990)        | 0.00000<br>(0.99990)        | 0.19940<br>(0.06257)        | 0.24712<br><b>(0.00455)</b> | 0.23125<br>(0.05425)        | 0.10916<br>(0.03168)        | 0.07692<br>(0.47787)        | 0.00000<br>(0.99990)        |
| <b>Bird Island (BI)</b>                                     | 0.75224<br><b>(0.00000)</b> | 0.6231<br><b>(0.00000)</b>  | 0.34289<br><b>(0.00010)</b> | 0.40973<br><b>(0.00000)</b> | 0.00000<br>(0.99990)        | 0.00000<br>(0.99990)        | *                           | 0.00000<br>(0.99990)        | 0.37725<br><b>(0.00743)</b> | 0.33222<br><b>(0.00000)</b> | 0.41492<br>(0.00812)        | 0.24677<br><b>(0.00317)</b> | 0.19101<br>(0.07247)        | 0.00997<br>(0.50589)        |
| <b>Martillo Island (MT)</b>                                 | 0.57055<br><b>(0.00020)</b> | 0.42329<br><b>(0.00020)</b> | 0.14980<br>(0.04990)        | 0.26665<br><b>(0.00010)</b> | 0.00000<br>(0.99990)        | 0.00000<br>(0.99990)        | 0.00000<br>(0.99990)        | *                           | 0.14818<br>(0.21107)        | 0.22308<br>(0.01901)        | 0.17778<br>(0.20889)        | 0.06971<br>(0.32304)        | 0.04328<br>(0.49352)        | 0.00000<br>(0.99990)        |
| <b>Signy Island (SIG)</b>                                   | 0.34300<br><b>(0.00050)</b> | 0.21259<br>(0.00772)        | 0.00000<br>(0.42926)        | 0.10256<br>(0.01049)        | 0.27433<br>(0.01188)        | 0.19940<br>(0.05910)        | 0.37721<br><b>(0.00644)</b> | 0.14815<br>(0.20602)        | *                           | 0.00234<br>(0.32710)        | 0.00000<br>(0.80032)        | 0.00000<br>(0.67835)        | 0.00000<br>(0.76676)        | 0.19722<br>(0.02148)        |
| <b>Copacabana (Admiralty Bay), King George Island (COP)</b> | 0.30121<br><b>(0.00000)</b> | 0.20420<br><b>(0.00020)</b> | 0.05519<br>(0.08088)        | 0.10420<br><b>(0.00119)</b> | 0.28632<br><b>(0.00000)</b> | 0.22873<br><b>(0.00267)</b> | 0.31195<br><b>(0.00000)</b> | 0.20492<br>(0.01158)        | 0.00000<br>(0.41917)        | *                           | 0.00000<br>(0.48758)        | 0.05467<br>(0.14523)        | 0.07275<br>(0.10237)        | 0.28589<br><b>(0.00000)</b> |

|                                                        |                             |                             |                              |                             |                             |                             |                             |                             |                             |                             |                             |                             |                             |                             |
|--------------------------------------------------------|-----------------------------|-----------------------------|------------------------------|-----------------------------|-----------------------------|-----------------------------|-----------------------------|-----------------------------|-----------------------------|-----------------------------|-----------------------------|-----------------------------|-----------------------------|-----------------------------|
| <b>Stranger Point,<br/>King George<br/>Island (SP)</b> | 0.34300<br><b>(0.00059)</b> | 0.21259<br><b>(0.00673)</b> | 0.00000<br><b>(0.42679)</b>  | 0.10256<br><b>(0.01089)</b> | 0.27433<br><b>(0.01049)</b> | 0.19940<br><b>(0.05871)</b> | 0.37721<br><b>(0.00911)</b> | 0.14815<br><b>(0.21572)</b> | 0.00000<br><b>(0.99990)</b> | 0.00000<br><b>(0.41659)</b> | *                           | 0.00000<br><b>(0.60539)</b> | 0.00000<br><b>(0.61578)</b> | 0.24091<br><b>(0.02534)</b> |
| <b>Bernardo<br/>O'Higgins Base<br/>(BO)</b>            | 0.33193<br><b>(0.00010)</b> | 0.20624<br><b>(0.00396)</b> | 0.00000<br><b>(0.36927)</b>  | 0.09915<br><b>(0.00980)</b> | 0.28556<br><b>(0.00228)</b> | 0.20379<br><b>(0.03227)</b> | 0.36842<br><b>(0.00307)</b> | 0.15691<br><b>(0.09583)</b> | 0.00000<br><b>(0.70231)</b> | 0.01547<br><b>(0.25443)</b> | 0.00000<br><b>(0.71211)</b> | *                           | 0.00000<br><b>(0.67538)</b> | 0.11697<br><b>(0.02614)</b> |
| <b>Gabriel<br/>González Videla<br/>Base (GGV)</b>      | 0.47406<br><b>(0.00000)</b> | 0.33467<br><b>(0.00030)</b> | 0.006308<br><b>(0.13523)</b> | 0.19909<br><b>(0.00010)</b> | 0.10105<br><b>(0.06811)</b> | 0.07692<br><b>(0.45609)</b> | 0.19101<br><b>(0.07613)</b> | 0.04328<br><b>(0.49906)</b> | 0.00000<br><b>(0.61479)</b> | 0.08597<br><b>(0.06376)</b> | 0.00000<br><b>(0.61608)</b> | 0.00485<br><b>(0.38432)</b> | *                           | 0.05175<br><b>(0.12306)</b> |
| <b>Jouglá Point<br/>(JP)</b>                           | 0.70966<br><b>(0.00000)</b> | 0.58554<br><b>(0.00000)</b> | 0.27327<br><b>(0.00168)</b>  | 0.39345<br><b>(0.00000)</b> | 0.00000<br><b>(0.99990)</b> | 0.00000<br><b>(0.99990)</b> | 0.00324<br><b>(0.50965)</b> | 0.00000<br><b>(0.99990)</b> | 0.23112<br><b>(0.02534)</b> | 0.28073<br><b>(0.00000)</b> | 0.23112<br><b>(0.02237)</b> | 0.25542<br><b>(0.00525)</b> | 0.05560<br><b>(0.12494)</b> | *                           |

S2B. TLR5

| Colony                                                                      | CR                   | MAR                  | COU                  | MO                   | CB                   | BR                   | BI                   | MT                   | SIG                  | COP                  | SP                   | BO                   | GGV                  | JP                   |
|-----------------------------------------------------------------------------|----------------------|----------------------|----------------------|----------------------|----------------------|----------------------|----------------------|----------------------|----------------------|----------------------|----------------------|----------------------|----------------------|----------------------|
| <b>Crozet Island<br/>(CR)</b>                                               | *<br>(0.15701)       | 0.10463<br>(0.00337) | 0.19875<br>(0.00426) | 0.14048<br>(0.00000) | 0.42400<br>(0.00000) | 0.61731<br>(0.00000) | 0.81884<br>(0.00000) | 0.65281<br>(0.00000) | 0.86382<br>(0.00000) | 0.83274<br>(0.00000) | 0.93688<br>(0.00000) | 0.88320<br>(0.00000) | 0.92114<br>(0.00000) | 0.96416<br>(0.00000) |
| <b>Marion Island<br/>(MAR)</b>                                              | 0.10463<br>(0.15602) | *<br>(0.00030)       | 0.27084<br>(0.00059) | 0.18983<br>(0.00000) | 0.46395<br>(0.00000) | 0.66343<br>(0.00000) | 0.84184<br>(0.00000) | 0.70960<br>(0.00000) | 0.90057<br>(0.00000) | 0.84665<br>(0.00000) | 0.97033<br>(0.00000) | 0.91651<br>(0.00000) | 0.95016<br>(0.00000) | 0.97642<br>(0.00000) |
| <b>Courbet<br/>Peninsula<br/>(COU)</b>                                      | 0.12961<br>(0.02485) | 0.27629<br>(0.00109) | *<br>(0.91209)       | 0.00000<br>(0.00050) | 0.17852<br>(0.00000) | 0.33854<br>(0.00000) | 0.55967<br>(0.00000) | 0.31502<br>(0.00000) | 0.50797<br>(0.00010) | 0.64872<br>(0.00000) | 0.58133<br>(0.00000) | 0.54190<br>(0.00000) | 0.60325<br>(0.00000) | 0.78796<br>(0.00000) |
| <b>Pointe du<br/>Morne (MO)</b>                                             | 0.10214<br>(0.00713) | 0.21189<br>(0.00000) | 0.00000<br>(0.56351) | *<br>(0.00000)       | 0.25438<br>(0.00000) | 0.42963<br>(0.00000) | 0.56884<br>(0.00000) | 0.41306<br>(0.00000) | 0.54117<br>(0.00000) | 0.63605<br>(0.00000) | 0.59046<br>(0.00000) | 0.55817<br>(0.00000) | 0.59835<br>(0.00000) | 0.72147<br>(0.00000) |
| <b>Cow Bay (CB)</b>                                                         | 0.28371<br>(0.00000) | 0.40690<br>(0.00000) | 0.10025<br>(0.00000) | 0.09881<br>(0.00000) | *<br>(0.09811)       | 0.05018<br>(0.00000) | 0.36548<br>(0.00000) | 0.05309<br>(0.11880) | 0.33306<br>(0.00000) | 0.45208<br>(0.00000) | 0.37935<br>(0.00000) | 0.34106<br>(0.00000) | 0.39910<br>(0.00000) | 0.54574<br>(0.00000) |
| <b>Bull Roads (BR)</b>                                                      | 0.39560<br>(0.00000) | 0.56722<br>(0.00000) | 0.18264<br>(0.00000) | 0.17234<br>(0.00000) | 0.03011<br>(0.09910) | *<br>(0.00000)       | 0.49814<br>(0.00000) | 0.00000<br>(0.71864) | 0.44207<br>(0.00188) | 0.58038<br>(0.00000) | 0.50051<br>(0.00059) | 0.46193<br>(0.00119) | 0.53330<br>(0.00020) | 0.73178<br>(0.00000) |
| <b>Bird Island (BI)</b>                                                     | 0.52955<br>(0.00000) | 0.66409<br>(0.00000) | 0.34622<br>(0.00000) | 0.30010<br>(0.00000) | 0.13386<br>(0.00000) | 0.22379<br>(0.00059) | *<br>(0.00000)       | 0.59937<br>(0.31730) | 0.00978<br>(0.12860) | 0.02817<br>(0.10425) | 0.05571<br>(0.30997) | 0.00778<br>(0.10553) | 0.06350<br>(0.00000) | 0.17521<br>(0.00000) |
| <b>Martillo Island<br/>(MT)</b>                                             | 0.37560<br>(0.00000) | 0.57279<br>(0.00000) | 0.14276<br>(0.00079) | 0.13905<br>(0.00010) | 0.04473<br>(0.05455) | 0.00000<br>(0.81279) | 0.31426<br>(0.00010) | *<br>(0.00010)       | 0.55172<br>(0.00000) | 0.67565<br>(0.00000) | 0.62473<br>(0.00020) | 0.57910<br>(0.00010) | 0.65295<br>(0.00000) | 0.83149<br>(0.00000) |
| <b>Signy Island<br/>(SIG)</b>                                               | 0.52861<br>(0.00000) | 0.71876<br>(0.00000) | 0.30275<br>(0.00000) | 0.26750<br>(0.00000) | 0.10387<br>(0.00762) | 0.19030<br>(0.01574) | 0.00557<br>(0.31136) | 0.27121<br>(0.00277) | *<br>(0.07187)       | 0.08135<br>(0.99990) | 0.00000<br>(0.67587) | 0.00000<br>(0.81546) | 0.00000<br>(0.12682) | 0.12682<br>(0.06009) |
| <b>Copacabana<br/>(Admiralty<br/>Bay), King<br/>George Island<br/>(COP)</b> | 0.42728<br>(0.00000) | 0.54018<br>(0.00000) | 0.26264<br>(0.00000) | 0.23785<br>(0.00000) | 0.11156<br>(0.00000) | 0.18623<br>(0.00109) | 0.06573<br>(0.03732) | 0.23511<br>(0.00990) | 0.09384<br>(0.05920) | *<br>(0.03990)       | 0.09581<br>(0.04594) | 0.08366<br>(0.01465) | 0.11085<br>(0.01465) | 0.20084<br>(0.00000) |
| <b>Stranger Point,<br/>King George<br/>Island (SP)</b>                      | 0.66455<br>(0.00000) | 0.84565<br>(0.00000) | 0.43966<br>(0.00000) | 0.36950<br>(0.00000) | 0.19855<br>(0.00020) | 0.31769<br>(0.00267) | 0.01752<br>(0.28591) | 0.42613<br>(0.00040) | 0.00000<br>(0.57499) | 0.17399<br>(0.01495) | *<br>(0.99990)       | 0.00000<br>(0.99990) | 0.00000<br>(0.99990) | 0.00000<br>(0.99990) |
| <b>Bernardo<br/>O'Higgins Base<br/>(BO)</b>                                 | 0.61772<br>(0.00000) | 0.79060<br>(0.00000) | 0.40132<br>(0.00000) | 0.34057<br>(0.00000) | 0.16943<br>(0.00050) | 0.27133<br>(0.00238) | 0.00117<br>(0.37323) | 0.36809<br>(0.00040) | 0.00000<br>(0.56757) | 0.14866<br>(0.01505) | 0.00000<br>(0.99990) | *<br>(0.79764)       | 0.00000<br>(0.21948) | 0.05537<br>(0.21948) |

|                        |                  |                  |                  |                  |                  |                  |                  |                  |           |                  |           |           |           |           |
|------------------------|------------------|------------------|------------------|------------------|------------------|------------------|------------------|------------------|-----------|------------------|-----------|-----------|-----------|-----------|
| <b>Gabriel</b>         | 0.58791          | 0.75247          | 0.37912          | 0.32380          | 0.15489          | 0.25607          | 0.00682          | 0.35394          | 0.00000   | 0.13331          | 0.00000   | 0.00000   | *         | 0.01709   |
| <b>González Videla</b> | <b>(0.00000)</b> | <b>(0.00000)</b> | <b>(0.00000)</b> | <b>(0.00000)</b> | <b>(0.00010)</b> | <b>(0.00248)</b> | (0.32373)        | <b>(0.00020)</b> | (0.86714) | (0.01802)        | (0.81378) | (0.99990) |           | (0.18543) |
| <b>Base (GGV)</b>      |                  |                  |                  |                  |                  |                  |                  |                  |           |                  |           |           |           |           |
| <b>Jouglá Point</b>    | 0.79404          | 0.87888          | 0.65499          | 0.52270          | 0.35294          | 0.53893          | 0.12200          | 0.65751          | 0.14763   | 0.30787          | 0.00000   | 0.00582   | 0.04903   | *         |
| <b>(JP)</b>            | <b>(0.00000)</b> | <b>(0.00000)</b> | <b>(0.00000)</b> | <b>(0.00000)</b> | <b>(0.00000)</b> | <b>(0.00000)</b> | <b>(0.00257)</b> | <b>(0.00000)</b> | (0.05821) | <b>(0.00000)</b> | (0.99990) | (0.57668) | (0.11989) |           |

S2C. TLR7

| Colony                                                      | CR                   | MAR                  | COU                  | MO                   | CB                   | BR                   | BI                   | MT                   | SIG                  | COP                  | SP                   | BO                   | GGV                  | JP                   |
|-------------------------------------------------------------|----------------------|----------------------|----------------------|----------------------|----------------------|----------------------|----------------------|----------------------|----------------------|----------------------|----------------------|----------------------|----------------------|----------------------|
| <b>Crozet Island (CR)</b>                                   | *<br>(0.99990)       | 0.00000<br>(0.99990) | 0.15385<br>(0.10049) | 0.03575<br>(0.25166) | 0.00000<br>(0.99990) | 0.15385<br>(0.2206)  | 0.24153<br>(0.1199)  | 0.00000<br>(0.99990) | 0.21932<br>(0.02099) | 0.00575<br>(0.41451) | 0.27835<br>(0.05821) | 0.07738<br>(0.08643) | 0.05127<br>(0.48193) | 0.00000<br>(0.62479) |
| <b>Marion Island (MAR)</b>                                  | 0.00000<br>(0.99990) | *<br>(0.03406)       | 0.17066<br>(0.12395) | 0.04320<br>(0.99990) | 0.00000<br>(0.99990) | 0.17065<br>(0.09524) | 0.26718<br>(0.0988)  | 0.00000<br>(0.99990) | 0.24170<br>(0.01584) | 0.01208<br>(0.25423) | 0.30218<br>(0.04445) | 0.09237<br>(0.06316) | 0.06381<br>(0.09049) | 0.00013<br>(0.26186) |
| <b>Courbet Peninsula (COU)</b>                              | 0.13462<br>(0.09613) | 0.15073<br>(0.03673) | *<br>(0.13038)       | 0.02638<br>(0.00515) | 0.24508<br>(0.91486) | 0.00000<br>(0.99990) | 0.00000<br>(0.99990) | 0.23966<br>(0.01079) | 0.09619<br>(0.11098) | 0.08448<br>(0.02208) | 0.17212<br>(0.02287) | 0.00000<br>(0.52817) | 0.06001<br>(0.09534) | 0.10587<br>(0.00871) |
| <b>Pointe du Morne (MO)</b>                                 | 0.06757<br>(0.16939) | 0.07580<br>(0.09940) | 0.00000<br>(0.58420) | *<br>(0.02198)       | 0.07551<br>(0.59489) | 0.00000<br>(0.60311) | 0.00000<br>(0.03643) | 0.06997<br>(0.02564) | 0.13982<br>(0.11662) | 0.02337<br>(0.00812) | 0.18981<br>(0.50470) | 0.00000<br>(0.20364) | 0.02590<br>(0.04425) | 0.03442<br>(0.04425) |
| <b>Cow Bay (CB)</b>                                         | 0.00000<br>(0.99990) | 0.00000<br>(0.99990) | 0.17804<br>(0.01307) | 0.08759<br>(0.01653) | *<br>(0.01950)       | 0.21440<br>(0.03059) | 0.30347<br>(0.99990) | 0.00000<br>(0.00099) | 0.31917<br>(0.03465) | 0.04066<br>(0.00941) | 0.35766<br>(0.02594) | 0.14082<br>(0.02277) | 0.10513<br>(0.04277) | 0.02675<br>(0.04277) |
| <b>Bull Roads (BR)</b>                                      | 0.15385<br>(0.21988) | 0.17065<br>(0.08841) | 0.00000<br>(0.99990) | 0.00000<br>(0.86308) | 0.18657<br>(0.0202)  | *<br>(0.99990)       | 0.00000<br>(0.03346) | 0.23965<br>(0.0694)  | 0.11188<br>(0.1389)  | 0.03171<br>(0.01792) | 0.19988<br>(0.80804) | 0.00000<br>(0.23849) | 0.03355<br>(0.10286) | 0.05073<br>(0.10286) |
| <b>Bird Island (BI)</b>                                     | 0.24153<br>(0.11771) | 0.26718<br>(0.10019) | 0.00000<br>(0.99990) | 0.00000<br>(0.61113) | 0.27337<br>(0.03158) | 0.00000<br>(0.99990) | *<br>(0.05029)       | 0.36906<br>(0.21364) | 0.08050<br>(0.25869) | 0.03041<br>(0.07247) | 0.18463<br>(0.99990) | 0.00000<br>(0.34026) | 0.02727<br>(0.19166) | 0.05262<br>(0.19166) |
| <b>Martillo Island (MT)</b>                                 | 0.00000<br>(0.99990) | 0.00000<br>(0.99990) | 0.21679<br>(0.01238) | 0.10671<br>(0.03554) | 0.00000<br>(0.99990) | 0.23965<br>(0.03772) | 0.36906<br>(0.04960) | *<br>(0.00307)       | 0.33218<br>(0.08039) | 0.03301<br>(0.01673) | 0.39735<br>(0.02525) | 0.15325<br>(0.03812) | 0.11382<br>(0.13583) | 0.01883<br>(0.13583) |
| <b>Signy Island (SIG)</b>                                   | 0.30744<br>(0.02069) | 0.33179<br>(0.01445) | 0.02088<br>(0.38392) | 0.09976<br>(0.05287) | 0.38145<br>(0.00376) | 0.06005<br>(0.21335) | 0.01582<br>(0.49480) | 0.42834<br>(0.00267) | *<br>(0.20493)       | 0.03625<br>(0.99990) | 0.00000<br>(0.44204) | 0.00039<br>(0.68350) | 0.00000<br>(0.16315) | 0.05056<br>(0.16315) |
| <b>Copacabana (Admiralty Bay), King George Island (COP)</b> | 0.05824<br>(0.12672) | 0.06574<br>(0.10247) | 0.00000<br>(0.51431) | 0.00125<br>(0.34294) | 0.07694<br>(0.00802) | 0.00000<br>(0.47381) | 0.00000<br>(0.51579) | 0.09310<br>(0.02079) | 0.03264<br>(0.16563) | *<br>(0.14266)       | 0.05349<br>(0.83318) | 0.00000<br>(0.86249) | 0.00000<br>(0.57965) | 0.00000<br>(0.57965) |
| <b>Stranger Point, King George Island (SP)</b>              | 0.27835<br>(0.05693) | 0.30218<br>(0.04792) | 0.03784<br>(0.22651) | 0.09551<br>(0.04534) | 0.33172<br>(0.00931) | 0.08347<br>(0.14523) | 0.05636<br>(0.26324) | 0.39735<br>(0.01832) | 0.00000<br>(0.99990) | 0.01031<br>(0.37036) | *<br>(0.19364)       | 0.06359<br>(0.60915) | 0.00000<br>(0.14642) | 0.05583<br>(0.14642) |
| <b>Bernardo O'Higgins Base (BO)</b>                         | 0.14089<br>(0.08128) | 0.15866<br>(0.07019) | 0.00000<br>(0.99990) | 0.00000<br>(0.76052) | 0.17845<br>(0.02544) | 0.00000<br>(0.99990) | 0.00000<br>(0.99990) | 0.23146<br>(0.02584) | 0.00000<br>(0.57440) | 0.00000<br>(0.82398) | 0.00000<br>(0.43817) | *<br>(0.83586)       | 0.00000<br>(0.48965) | 0.00000<br>(0.48965) |

|                                                   |                      |                      |                      |                      |                      |                      |                      |                      |                      |                      |                      |                      |                      |                      |
|---------------------------------------------------|----------------------|----------------------|----------------------|----------------------|----------------------|----------------------|----------------------|----------------------|----------------------|----------------------|----------------------|----------------------|----------------------|----------------------|
| <b>Gabriel<br/>González Videla<br/>Base (GGV)</b> | 0.10256<br>(0.21968) | 0.11742<br>(0.08841) | 0.00000<br>(0.68023) | 0.00000<br>(0.45857) | 0.13061<br>(0.03425) | 0.00000<br>(0.7821)  | 0.00000<br>(0.58202) | 0.17796<br>(0.03861) | 0.00000<br>(0.58103) | 0.00000<br>(0.99990) | 0.00000<br>(0.61053) | 0.00000<br>(0.99990) | *                    | 0.00000<br>(0.85031) |
| <b>Joula Point<br/>(JP)</b>                       | 0.05241<br>(0.11712) | 0.05952<br>(0.09356) | 0.00000<br>(0.39155) | 0.00830<br>(0.22443) | 0.06981<br>(0.01099) | 0.00696<br>(0.32888) | 0.00000<br>(0.38491) | 0.08498<br>(0.01634) | 0.03980<br>(0.14929) | 0.00000<br>(0.76933) | 0.01196<br>(0.36442) | 0.00000<br>(0.70765) | 0.00000<br>(0.93100) | *                    |



## S2D. HVR1

| Colony                                                               | CR                   | MAR                  | COU                  | MO                   | CB                   | BR                   | BI                   | MT                   | SIG                  | COP                  | SP                   | JP                   |
|----------------------------------------------------------------------|----------------------|----------------------|----------------------|----------------------|----------------------|----------------------|----------------------|----------------------|----------------------|----------------------|----------------------|----------------------|
| <b>Crozet Island</b><br>(CR)                                         | *<br>(0.56638)       | 0.00000<br>(0.03178) | 0.98071<br>(0.00000) | 0.97191<br>(0.00000) | 0.96572<br>(0.00000) | 0.97018<br>(0.00040) | 0.97094<br>(0.00000) | 0.96879<br>(0.00149) | 0.96497<br>(0.00149) | 0.9557<br>(0.00000)  | 0.94835<br>(0.00010) | 0.96015<br>(0.00000) |
| <b>Marion Island</b><br>(MAR)                                        | 0.00000<br>(0.66974) | *<br>(0.02376)       | 0.98950<br>(0.00000) | 0.97523<br>(0.00000) | 0.97019<br>(0.00000) | 0.97819<br>(0.00020) | 0.97591<br>(0.00000) | 0.97818<br>(0.00079) | 0.97557<br>(0.00069) | 0.96038<br>(0.00000) | 0.95916<br>(0.00040) | 0.96415<br>(0.00000) |
| <b>Courbet Peninsula</b><br>(COU)                                    | 0.35052<br>(0.11405) | 0.39100<br>(0.02455) | *<br>(0.01287)       | 0.29453<br>(0.00683) | 0.94336<br>(0.02673) | 0.96564<br>(0.00594) | 0.96057<br>(0.04821) | 0.96480<br>(0.04831) | 0.95757<br>(0.00475) | 0.92969<br>(0.03534) | 0.90586<br>(0.00297) | 0.93788<br>(0.00297) |
| <b>Pointe du Morne</b><br>(MO)                                       | 0.08579<br>(0.00238) | 0.11761<br>(0.00030) | 0.21195<br>(0.02079) | *<br>(0.00000)       | 0.92836<br>(0.00000) | 0.92743<br>(0.00000) | 0.92721<br>(0.00000) | 0.92737<br>(0.00000) | 0.91436<br>(0.00010) | 0.91865<br>(0.00000) | 0.90576<br>(0.00000) | 0.92253<br>(0.00000) |
| <b>Cow Bay</b><br>(CB)                                               | 0.11875<br>(0.00257) | 0.15084<br>(0.00099) | 0.28772<br>(0.02138) | 0.07047<br>(0.00010) | *<br>(0.03356)       | 0.10968<br>(0.00000) | 0.7874<br>(0.00000)  | 0.28031<br>(0.00208) | 0.74375<br>(0.00000) | 0.71836<br>(0.00000) | 0.70848<br>(0.00000) | 0.73538<br>(0.00000) |
| <b>Bull Roads</b><br>(BR)                                            | 0.14286<br>(0.01188) | 0.17963<br>(0.00564) | 0.35052<br>(0.10781) | 0.08579<br>(0.00248) | 0.08636<br>(0.03257) | *<br>(0.00000)       | 0.84043<br>(0.03346) | 0.28029<br>(0.00158) | 0.82431<br>(0.00158) | 0.75894<br>(0.00000) | 0.74524<br>(0.00069) | 0.77946<br>(0.00000) |
| <b>Bird Island</b><br>(BI)                                           | 0.12855<br>(0.00653) | 0.16014<br>(0.00059) | 0.29812<br>(0.01228) | 0.07930<br>(0.00000) | 0.10888<br>(0.00010) | 0.12855<br>(0.00624) | *<br>(0.00000)       | 0.84374<br>(0.00000) | 0.32908<br>(0.00030) | 0.24287<br>(0.00000) | 0.25257<br>(0.00020) | 0.22048<br>(0.00000) |
| <b>Martillo Island</b><br>(MT)                                       | 0.25878<br>(0.00465) | 0.29433<br>(0.00218) | 0.55224<br>(0.10375) | 0.17732<br>(0.00040) | 0.21433<br>(0.00238) | 0.10862<br>(0.12751) | 0.22363<br>(0.00168) | *<br>(0.00762)       | 0.80733<br>(0.00762) | 0.74466<br>(0.00000) | 0.70428<br>(0.00287) | 0.76889<br>(0.00000) |
| <b>Signy Island</b><br>(SIG)                                         | 0.07667<br>(0.10969) | 0.11833<br>(0.05465) | 0.28571<br>(0.04663) | 0.02460<br>(0.19840) | 0.05851<br>(0.11118) | 0.07667<br>(0.10920) | 0.06939<br>(0.07970) | 0.20000<br>(0.07801) | *<br>(0.29324)       | 0.01749<br>(0.29324) | 0.03152<br>(0.26304) | 0.01385<br>(0.29621) |
| <b>Copacabana</b><br>(Admiralty Bay),<br>King George<br>Island (COP) | 0.08074<br>(0.00208) | 0.11247<br>(0.00010) | 0.23804<br>(0.01861) | 0.03770<br>(0.00000) | 0.06588<br>(0.00020) | 0.08074<br>(0.00257) | 0.07469<br>(0.00000) | 0.17159<br>(0.00030) | 0.01948<br>(0.22285) | *<br>(0.53480)       | 0.00000<br>(0.53480) | 0.01858<br>(0.15929) |
| <b>Stranger Point,</b><br>King George<br>Island (SP)                 | 0.07363<br>(0.10019) | 0.11346<br>(0.04574) | 0.26829<br>(0.03198) | 0.02384<br>(0.16553) | 0.05657<br>(0.07574) | 0.07363<br>(0.10217) | 0.06709<br>(0.05653) | 0.18978<br>(0.00119) | 0.00000<br>(0.99990) | 0.01097<br>(0.31829) | *<br>(0.14088)       | 0.06616<br>(0.08742) |
| <b>Jouglu Point</b><br>(JP)                                          | 0.09405<br>(0.00475) | 0.12503<br>(0.00069) | 0.25198<br>(0.01376) | 0.05014<br>(0.00030) | 0.07823<br>(0.00010) | 0.09405<br>(0.00465) | 0.06869<br>(0.00050) | 0.18393<br>(0.00149) | 0.01765<br>(0.26225) | 0.02247<br>(0.04208) | 0.03323<br>(0.14088) | *<br>(0.14088)       |

**Supplementary Table S3.** Census population size (number of breeding pairs) applied to analyses related to each colony, based on best available census data for each island group or region, with census year and reference information.

| Colony | Census Region                                          | Census Population (breeding pairs) | Year    | Reference / Notes                                                                                                                                                                                                                                                                        |
|--------|--------------------------------------------------------|------------------------------------|---------|------------------------------------------------------------------------------------------------------------------------------------------------------------------------------------------------------------------------------------------------------------------------------------------|
| CR     | Crozet Archipelago                                     | 9,000                              | 1994    | Jouventin, 1994.                                                                                                                                                                                                                                                                         |
| MAR    | Marion Island                                          | 600                                | 2012/13 | Crawford, et al. 2014.                                                                                                                                                                                                                                                                   |
| COU    | Kerguelen Islands                                      | 30,000                             | 1988    | Weimerskirch, et al. 1988. (*Lescroel, and Bost, 2006. show significant decrease in 2002 of Kerguelen population, but was localized to the sampled portion of the archipelago, leading us to use 30,000 as the lower range number for Weimerskirch, et al. 1998's estimate of 30-40,000) |
| MO     |                                                        |                                    |         |                                                                                                                                                                                                                                                                                          |
| CB     | Falkland/ Malvinas Islands                             | 132,321                            | 2010    | Baylis, et al. 2013.                                                                                                                                                                                                                                                                     |
| BR     |                                                        |                                    |         |                                                                                                                                                                                                                                                                                          |
| BI     | South Georgia                                          | 98,867                             | 1996    | Trathan, et al. 1996.                                                                                                                                                                                                                                                                    |
| MT     | Martillo Island                                        | 12                                 | 2006/07 | Ghys, et al. 2008.                                                                                                                                                                                                                                                                       |
| SIG    | South Orkney Islands                                   | 10,760                             | 2013    | Lynch 2013.                                                                                                                                                                                                                                                                              |
| COP    | South Shetland Islands and Western Antarctic Peninsula | 94,751                             | 2013    | Lynch 2013.                                                                                                                                                                                                                                                                              |
| SP     |                                                        |                                    |         |                                                                                                                                                                                                                                                                                          |
| BO     |                                                        |                                    |         |                                                                                                                                                                                                                                                                                          |
| GGV    |                                                        |                                    |         |                                                                                                                                                                                                                                                                                          |
| JP     |                                                        |                                    |         |                                                                                                                                                                                                                                                                                          |

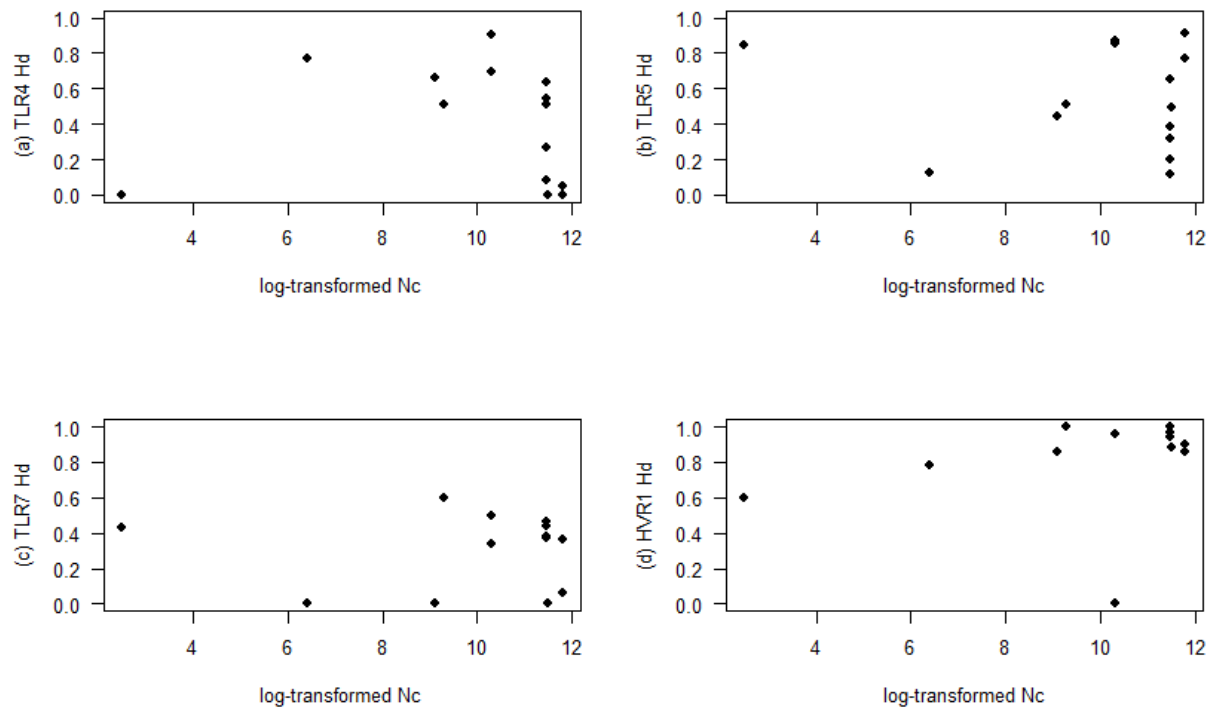

**Supplementary Figure S1.** Haplotype diversity ( $H_d$ ) for (a)  $TLR4$ , (b),  $TLR5$ , (c)  $TLR7$ , and (d) mtDNA HVR1 in relation to census population size across Gentoo penguin colonies. Census population sizes and their source publications used for analyses are found in Supplementary Table S3.

**Supplementary Table S4.** Spearman's rank correlations and  $p$  values calculated for each haplotype diversity  $H_d$  vs. census population size comparison depicted in Supplementary Figure S1.

| Locus  | Spearman's rank correlation | $p$     |
|--------|-----------------------------|---------|
| $TLR4$ | -0.5029245                  | 0.06679 |
| $TLR5$ | 0.09462364                  | 0.7476  |
| $TLR7$ | -0.1380377                  | 0.6379  |
| HVR1   | N/A                         | 0.3263  |

**Supplementary Table S5A.** Mantel Test results for Isolation by Distance for each locus, using  $F_{ST}$  (Weir and Cockerham 1984) values against a matrix of geographic distance (km), with significance evaluated using 10,000 permutations in Arlequin.

| <b>Mantel Test Locus</b> | <b>Correlation Coefficient (R)</b> | <b>P value</b> |
|--------------------------|------------------------------------|----------------|
| <i>TLR4</i>              | 0.514998                           | 0.0011         |
| <i>TLR5</i>              | 0.592887                           | 0.0010         |
| <i>TLR7</i>              | 0.026662                           | 0.3677         |
| <b>HVR1</b>              | 0.311577                           | 0.0153         |

**Supplementary Table S5B.** Pairwise geographic distances (most direct distance by sea during summer sea ice extent, in km) used for Mantel's test, derived from Google Earth v7.3.2.5776.

| <b>Colony</b>                                               | <b>CR</b> | <b>MAR</b> | <b>COU</b> | <b>MO</b> | <b>CB</b> | <b>BR</b> | <b>BI</b> | <b>MT</b> | <b>SIG</b> | <b>COP</b> | <b>SP</b> | <b>BO</b> | <b>GGV</b> | <b>JP</b> |
|-------------------------------------------------------------|-----------|------------|------------|-----------|-----------|-----------|-----------|-----------|------------|------------|-----------|-----------|------------|-----------|
| <b>Crozet Island (CR)</b>                                   | 0         |            |            |           |           |           |           |           |            |            |           |           |            |           |
| <b>Marion Island (MAR)</b>                                  | 960       | 0          |            |           |           |           |           |           |            |            |           |           |            |           |
| <b>Courbet Peninsula (COU)</b>                              | 1577      | 2461       | 0          |           |           |           |           |           |            |            |           |           |            |           |
| <b>Pointe du Morne (MO)</b>                                 | 1565      | 2449       | 14         | 0         |           |           |           |           |            |            |           |           |            |           |
| <b>Cow Bay (CB)</b>                                         | 7190      | 6481       | 7850       | 7837      | 0         |           |           |           |            |            |           |           |            |           |
| <b>Bull Roads (BR)</b>                                      | 7185      | 6504       | 7833       | 7819      | 168       | 0         |           |           |            |            |           |           |            |           |
| <b>Bird Island (BI)</b>                                     | 5958      | 5204       | 6786       | 6773      | 1359      | 1432      | 0         |           |            |            |           |           |            |           |
| <b>Martillo Island (MT)</b>                                 | 7354      | 6743       | 7915       | 7903      | 792       | 639       | 1892      | 0         |            |            |           |           |            |           |
| <b>Signy Island (SIG)</b>                                   | 5955      | 5315       | 6565       | 6555      | 1282      | 1258      | 901       | 1437      | 0          |            |           |           |            |           |
| <b>Copacabana (Admiralty Bay), King George Island (COP)</b> | 6419      | 5848       | 6978       | 6970      | 1275      | 1173      | 1501      | 1010      | 705        | 0          |           |           |            |           |
| <b>Stranger Point, King George Island (SP)</b>              | 6421      | 5849       | 6979       | 6971      | 1262      | 1161      | 1506      | 995       | 711        | 13         | 0         |           |            |           |
| <b>Bernardo O'Higgins Base (BO)</b>                         | 6402      | 5804       | 6936       | 6928      | 1351      | 1248      | 1536      | 1085      | 708        | 130        | 125       | 0         |            |           |
| <b>Gabriel González Videla Base (GGV)</b>                   | 6705      | 6107       | 7237       | 7229      | 1522      | 1414      | 1837      | 1147      | 1009       | 372        | 360       | 302       | 0          |           |
| <b>Jouglu Point (JP)</b>                                    | 6719      | 6138       | 7264       | 7256      | 1543      | 1435      | 1861      | 1170      | 1035       | 400        | 391       | 328       | 45         | 0         |

**Supplementary Table S6A.** Log-likelihood comparisons for PAML (Yang 1997; Yang 2007) analysis of *TLR4*.

| <b>Model</b> | <b>lnL</b>   | <b>2(lnL<sub>1</sub>-lnL<sub>0</sub>)</b> | <b>df</b> | <b><i>p</i>-value</b> |
|--------------|--------------|-------------------------------------------|-----------|-----------------------|
| <b>M1a</b>   | -3605.474038 | 8.334527999999986                         | 2         | 0.015494595           |
| <b>M2a</b>   | -3597.13951  |                                           |           |                       |
| <b>M7</b>    | -3605.717024 | 8.336043000000025                         | 2         | 0.015482863           |
| <b>M8</b>    | -3597.380981 |                                           |           |                       |
| <b>M8a</b>   | -3605.474029 | 8.093048000000018                         | 2         | 0.01748304            |
| <b>M8</b>    | -3597.380981 |                                           |           |                       |

**Supplementary Table S6B.** Bayes Empirical Bayes (Yang, et al. 2005) analysis of *P. papua TLR4* sites under positive selection with posterior probability >0.90. Sites obtained from *codeml* M2a.

| <b>Amino acid pos.</b> | <b>Amino acid</b> | <b>Pr(<math>\omega &gt; 1</math>)</b> | <b>Mean <math>\omega \pm</math> SE</b> |
|------------------------|-------------------|---------------------------------------|----------------------------------------|
| 12                     | V                 | 0.932                                 | 7.669 $\pm$ 2.761                      |
| 236                    | I                 | 0.932                                 | 7.669 $\pm$ 2.761                      |
| 659                    | A                 | 0.933                                 | 7.671 $\pm$ 2.759                      |

**Supplementary Table S6C.** Bayes Empirical Bayes analysis of *P. papua TLR4* sites under positive selection with posterior probability >0.90. Sites obtained from *codeml* M8.

| <b>Amino acid pos.</b> | <b>Amino acid</b> | <b>Pr(<math>\omega &gt; 1</math>)</b> | <b>Mean <math>\omega \pm</math> SE</b> |
|------------------------|-------------------|---------------------------------------|----------------------------------------|
| 12                     | V                 | 0.947                                 | 1.461 $\pm$ 0.163                      |
| 82                     | N                 | 0.936                                 | 1.485 $\pm$ 0.000                      |
| 236                    | I                 | 0.947                                 | 1.461 $\pm$ 0.163                      |
| 316                    | C                 | 0.936                                 | 1.485 $\pm$ 0.000                      |
| 445                    | Q                 | 0.936                                 | 1.485 $\pm$ 0.000                      |
| 659                    | A                 | 0.947                                 | 1.461 $\pm$ 0.163                      |

**Supplementary Table S6D.** Log-likelihood comparisons for PAML analysis of *TLR5*.

| <b>Model</b> | <b>lnL</b>   | <b>2(lnL<sub>1</sub>-lnL<sub>0</sub>)</b> | <b>df</b> | <b>p-value</b> |
|--------------|--------------|-------------------------------------------|-----------|----------------|
| <b>M1a</b>   | -3929.201728 | 102.078912                                | 2         | 6.821e-23      |
| <b>M2a</b>   | -3878.162272 |                                           |           |                |
| <b>M7</b>    | -3929.323036 | 102.311604                                | 2         | 6.072e-23      |
| <b>M8</b>    | -3878.167234 |                                           |           |                |
| <b>M8a</b>   | -3928.465238 | 100.596008                                | 2         | 7.16e-23       |
| <b>M8</b>    | -3878.167234 |                                           |           |                |

**Supplementary Table S6E.** Bayes Empirical Bayes analysis of *P. papua TLR5* sites under positive selection with posterior probability >0.90. Sites obtained from *codeml* M2a.

| <b>Amino acid pos.</b> | <b>Amino acid</b> | <b>Pr(<math>\omega &gt; 1</math>)</b> | <b>Mean <math>\omega \pm</math> SE</b> |
|------------------------|-------------------|---------------------------------------|----------------------------------------|
| 10                     | Y                 | 1.000                                 | 9.645 $\pm$ 0.504                      |
| 285                    | M                 | 0.980                                 | 9.472 $\pm$ 1.320                      |
| 442                    | A                 | 0.998                                 | 9.631 $\pm$ 0.609                      |
| 535                    | S                 | 0.981                                 | 9.482 $\pm$ 1.286                      |
| 667                    | S                 | 1.000                                 | 9.643 $\pm$ 0.514                      |
| 698                    | M                 | 0.980                                 | 9.469 $\pm$ 1.329                      |
| 747                    | L                 | 0.985                                 | 9.518 $\pm$ 1.163                      |
| 788                    | C                 | 0.982                                 | 9.492 $\pm$ 1.255                      |
| 845                    | V                 | 1.000                                 | 9.645 $\pm$ 0.503                      |

**Supplementary Table S6F.** Bayes Empirical Bayes analysis of *P. papua* TLR5 sites under positive selection with posterior probability >0.90. Sites obtained from *codeml* M8a.

| <b>Amino acid pos.</b> | <b>Amino acid</b> | <b>Pr(<math>\omega &gt; 1</math>)</b> | <b>Mean <math>\omega \pm</math> SE</b> |
|------------------------|-------------------|---------------------------------------|----------------------------------------|
| 10                     | Y                 | 1.000                                 | 8.947 $\pm$ 1.200                      |
| 285                    | M                 | 0.989                                 | 8.855 $\pm$ 1.487                      |
| 442                    | A                 | 0.999                                 | 8.941 $\pm$ 1.219                      |
| 535                    | S                 | 0.989                                 | 8.860 $\pm$ 1.472                      |
| 667                    | S                 | 1.000                                 | 8.946 $\pm$ 1.202                      |
| 698                    | M                 | 0.988                                 | 8.853 $\pm$ 1.490                      |
| 747                    | L                 | 0.991                                 | 8.878 $\pm$ 1.421                      |
| 788                    | C                 | 0.990                                 | 8.865 $\pm$ 1.459                      |
| 845                    | V                 | 1.000                                 | 8.947 $\pm$ 1.200                      |

**Supplementary Table S7.** Physiochemical distances between amino acid variants at positively selected sites in TLR4 and TLR5, as given by several authors, detailed in the lower table. Red colors indicate a greater physiochemical distance, while green colors indicate a lower physiochemical distance. \*Epstein's distance has an element of directionality, so both directions are given: Epstein\_1 = variant\_1 → variant\_2; Epstein\_2 = variant\_2 → variant\_1.

| TLR  | nt_site | aa_site | variant_1 | variant_2 | Grantham [1] | Sneath [2] | Epstein_1 [3] | Epstein_2 [3] | Miyata [4] | Urbina [5] |
|------|---------|---------|-----------|-----------|--------------|------------|---------------|---------------|------------|------------|
| TLR4 | 35      | 12      | V         | A         | 64           | 12         | 0.4           | 0.41          | 1.85       | 3.125      |
| TLR4 | 706     | 236     | V         | I         | 29           | 7          | 0.03          | 0.05          | 0.85       | 0.873      |
| TLR4 | 1977    | 659     | A         | T         | 58           | 20         | 0.41          | 0.4           | 0.9        | 1.795      |
| TLR5 | 29      | 10      | C         | Y         | 194          | 34         | 0.25          | 0.13          | 2.38       | 3.591      |
| TLR5 | 854     | 285     | T         | M         | 81           | 25         | 0.8           | 0.8           | 1.86       | 2.404      |
| TLR5 | 1325    | 442     | A         | V         | 64           | 12         | 0.41          | 0.4           | 1.85       | 3.125      |
| TLR5 | 1604    | 535     | S         | T         | 58           | 12         | 0.03          | 0.03          | 0.89       | 1.697      |
| TLR5 | 2000    | 667     | F         | S         | 155          | 25         | 0.81          | 0.81          | 3.45       | 4.544      |
| TLR5 | 2094    | 698     | I         | M         | 10           | 22         | 0.05          | 0.03          | 0.29       | 1.565      |
| TLR5 | 2239    | 747     | V         | L         | 32           | 9          | 0.05          | 0.03          | 0.91       | 0.831      |
| TLR5 | 2362    | 788     | S         | C         | 112          | 13         | 0.6           | 0.6           | 2.84       | 2.758      |
| TLR5 | 2533    | 845     | V         | I         | 29           | 7          | 0.05          | 0.03          | 0.85       | 0.873      |

| Number | Criteria                                                                                                                                              | Range                 | Reference             |
|--------|-------------------------------------------------------------------------------------------------------------------------------------------------------|-----------------------|-----------------------|
| [1]    | composition, polarity, molecular volume                                                                                                               | 5(low)-215(high)      | Grantham (1974)       |
| [2]    | 134 categories of activity and structure                                                                                                              | 5(low)-45(high)       | Sneath (1966)         |
| [3]*   | polarity, size                                                                                                                                        | 0(low)-1.02(high)     | Epstein (1967)        |
| [4]    | volume, polarity                                                                                                                                      | 0.06(low)-5.13(high)  | Miyata (1979)         |
| [5]    | volume, bulkiness, polarity, isoelectric point, hydrophobicity, surface area accessible to water, fraction of accessible area lost when protein folds | 1.031(low)-7.08(high) | Urbina, et al. (2006) |



**Supplementary Table S8.** Positions of Gentoo penguin positively selected sites with respect to sites of known function in other vertebrates. The position and name of the corresponding chicken amino acid is given for each Gentoo TLR position, as chicken TLRs are typically the best-studied and best-annotated TLRs. “other\_literature” denotes a study in which the described sites have also been found to be positively selected in a particular taxon (references are given below). “function” denotes the potential for change in function, due to proximity to sites of known function. “N/A” indicates that the Gentoo TLR5 open reading frame begins upstream of other known TLRs, so no functional information is known.

| TLR  | nt_site | aa_site | variant_1 | variant_2 | chicken_posn | chicken_aa | other_literature                          | function                                                                                                 |
|------|---------|---------|-----------|-----------|--------------|------------|-------------------------------------------|----------------------------------------------------------------------------------------------------------|
| TLR4 | 35      | 12      | V         | A         | 6            | A          | Velová, et al. 2018                       | No                                                                                                       |
| TLR4 | 706     | 236     | V         | I         | 230          | I          | No                                        | No                                                                                                       |
| TLR4 | 1977    | 659     | A         | T         | 653          | A          | No                                        | No                                                                                                       |
| TLR5 | 29      | 10      | C         | Y         | N/A          | N/A        | N/A                                       | N/A                                                                                                      |
| TLR5 | 854     | 285     | T         | M         | 267          | M          | No                                        | Adjacent to two residues in flagellin-binding interface B (266,268) Yoon, et al. 2012; Song, et al. 2017 |
| TLR5 | 1325    | 442     | A         | V         | 424          | A          | Velová, et al. 2018; Grueber, et al. 2014 | No                                                                                                       |
| TLR5 | 1604    | 535     | S         | T         | 517          | S          | No                                        | No                                                                                                       |
| TLR5 | 2000    | 667     | F         | S         | 649          | S          | No                                        | No                                                                                                       |
| TLR5 | 2094    | 698     | I         | M         | 680          | L          | Velová, et al. 2018                       | No                                                                                                       |
| TLR5 | 2239    | 747     | V         | L         | 729          | L          | No                                        | No                                                                                                       |
| TLR5 | 2362    | 788     | S         | C         | 770          | C          | No                                        | No                                                                                                       |
| TLR5 | 2533    | 845     | V         | I         | 827          | I          | No                                        | No                                                                                                       |

## TLR4

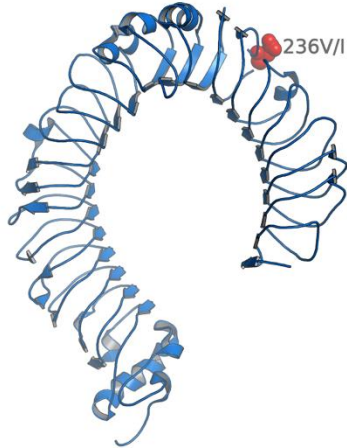

## TLR5

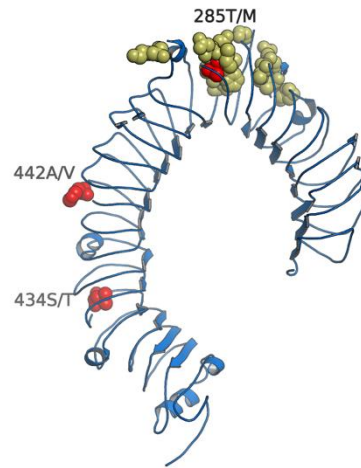

**Supplementary Figure S2.** Positions of positively selected sites in Gentoo penguin TLR4 and TLR5 ectodomains. Positively selected sites from PAML analysis (highlighted in red) are superimposed on homologous sites from the crystal structure of mouse TLR4 ectodomain (PDB: 2Z64) and a homology model of human TLR5 ectodomain (PDB: 3J0A). Further positively selected sites in the signal peptide of TLR4 (12V/A) and TLR5 (10C/Y), as well as TMD/TIR domain sites (TLR4: 659A/T; TLR5: 667F/S, 698I/M, 747V/L, 788S/C, 845V/I) were omitted because the residues are not included in the available model structure, or were of low confidence. Relative positions of these residues are depicted schematically in main text Figure 6. Site 285T/M is located within interface-B of the flagellin binding site (Yoon, et al. 2012; Song, et al. 2017), which is highlighted in yellow. No other positively selected sites were found to be proximal to sites of known function in other vertebrates.

**Supplementary Table S9.** *In silico* prediction of change of function of positively selected sites using the homology-based methods SIFT (Ng and Henikoff 2003) and PolyPhen-2 (Adzhubei, et al. 2013). Both SIFT and PolyPhen-2 are directional, so the scores for each variant 1 → variant 2 and variant 2 → variant 1 are given. Red colours indicate the change is likely to be of high consequence, while green colours indicate milder consequences.

| TLR  | nt_site | aa_site | variant_1 | variant_2 | SIFT  |      |       |      | Polyphen2 |             |             |       |             |             |
|------|---------|---------|-----------|-----------|-------|------|-------|------|-----------|-------------|-------------|-------|-------------|-------------|
|      |         |         |           |           | v1→v2 |      | v2→v1 |      | v1→v2     |             |             | v2→v1 |             |             |
|      |         |         |           |           | score | MSC  | score | MSC  | score     | sensitivity | specificity | score | sensitivity | specificity |
| TLR4 | 35      | 12      | V         | A         | 0.15  | 3.34 | 0.58  | 3.38 | N/A       | N/A         | N/A         | 0.997 | 0.410       | 0.980       |
| TLR4 | 706     | 236     | V         | I         | 1.00  | 3.20 | 0.18  | 3.21 | 0.001     | 0.990       | 0.150       | 0.049 | 0.940       | 0.830       |
| TLR4 | 1977    | 659     | A         | T         | 0.20  | 3.04 | 0.25  | 3.05 | 0.810     | 0.840       | 0.930       | 0.000 | 1.000       | 0.000       |
| TLR5 | 29      | 10      | C         | Y         | 0.00  | 4.32 | 0.00  | 4.32 | 0.004     | 0.970       | 0.590       | N/A   | N/A         | N/A         |
| TLR5 | 854     | 285     | T         | M         | 0.43  | 3.36 | 0.10  | 3.36 | 0.000     | 1.000       | 0.000       | 0.990 | 0.720       | 0.970       |
| TLR5 | 1325    | 442     | A         | V         | 0.51  | 3.55 | 0.72  | 3.36 | 0.165     | 0.920       | 0.870       | 0.000 | 1.000       | 0.000       |
| TLR5 | 1604    | 535     | S         | T         | 0.38  | 3.36 | 0.82  | 3.36 | 0.253     | 0.910       | 0.880       | 0.000 | 1.000       | 0.000       |
| TLR5 | 2000    | 667     | F         | S         | 0.34  | 3.36 | 0.01  | 3.36 | 0.000     | 1.000       | 0.000       | 0.998 | 0.270       | 0.990       |
| TLR5 | 2094    | 698     | I         | M         | 0.06  | 3.36 | 0.45  | 3.36 | 0.009     | 0.960       | 0.770       | 0.005 | 0.970       | 0.740       |
| TLR5 | 2239    | 747     | V         | L         | 1.00  | 3.36 | 0.00  | 3.36 | 0.000     | 1.000       | 0.000       | 0.000 | 1.000       | 0.000       |
| TLR5 | 2362    | 788     | S         | C         | 1.00  | 3.36 | 0.00  | 3.36 | 0.000     | 1.000       | 0.000       | 0.992 | 0.700       | 0.970       |
| TLR5 | 2533    | 845     | V         | I         | 0.45  | 3.36 | 1.00  | 3.36 | 0.024     | 0.950       | 0.810       | 0.000 | 1.000       | 0.000       |

|            |     |                       |          |         |              |             |       |       |       |
|------------|-----|-----------------------|----------|---------|--------------|-------------|-------|-------|-------|
| GENTOOPEN1 | 636 | DRYCVPPAFAGVPLSSITFDG | CNEDELQ  | OTLRFSV | FTITLTLFLMAV | IFTRCRGICFV | WYKTI | TKKMI | DSHPQ |
| GENTOOPEN2 |     | DRYCVPPAFAGVPLSSITFDG | CNEDELQ  | OTLRFSV | FTITLTLFLMAV | IFTRCRGICFV | WYKTI | TKKMI | DSHPQ |
| CHICKEN    |     | DRYCVPPALAGVPSSTITD   | CCDEDELQ | OTLRFSV | FTITLTLFLMAV | IFTRCRGICFV | WYKTI | TKKMI | DSHPQ |
| CEYLONJUNG |     | DRYCVPPALAGVPSSTITD   | CCDEDELQ | OTLRFSV | FTITLTLFLMAV | IFTRCRGICFV | WYKTI | TKKMI | DSHPQ |
| DOMESTICGO |     | DRYCVPPALAGVPLSSITFDG | CNEDELQ  | OTLRFSV | FTITLTLFLMAV | IFTRCRGICFV | WYKTI | TKKMI | DSHPQ |
| GREYPARTRI |     | DRYCVPPALAGVPSSTITD   | CCDEDELQ | OTLRFSV | FTITLTLFLMAV | IFTRCRGICFV | WYKTI | TKKMI | DSHPQ |
| COMMONSHEL |     | DRYCVPPALAGVPSSTITD   | CCDEDELQ | OTLRFSV | FTITLTLFLMAV | IFTRCRGICFV | WYKTI | TKKMI | DSHPQ |
| MALLARD    |     | DRYCVPPALAGVPSSTITD   | CCDEDELQ | OTLRFSV | FTITLTLFLMAV | IFTRCRGICFV | WYKTI | TKKMI | DSHPQ |
| ROCKFISHON |     | DRYCVPPALAGVPSSTITD   | CCDEDELQ | OTLRFSV | FTITLTLFLMAV | IFTRCRGICFV | WYKTI | TKKMI | DSHPQ |
| INDIANPEAF |     | DRYCVPPALAGVPSSTITD   | CCDEDELQ | OTLRFSV | FTITLTLFLMAV | IFTRCRGICFV | WYKTI | TKKMI | DSHPQ |
| BAND-TAILE |     | DRYCVPPALAGVPSSTITD   | CCDEDELQ | OTLRFSV | FTITLTLFLMAV | IFTRCRGICFV | WYKTI | TKKMI | DSHPQ |
| ZEBRAFINCH |     | DRYCVPPAFAGVPLSSITFDG | CNEDELQ  | OTLRFSV | FTITLTLFLMAV | IFTRCRGICFV | WYKTI | TKKMI | DSHPQ |
| COLLAREDFL |     | DRYCVPPAFAGVPLSSITFDG | CNEDELQ  | OTLRFSV | FTITLTLFLMAV | IFTRCRGICFV | WYKTI | TKKMI | DSHPQ |
| PEREGRINEF |     | DRYCVPPAFAGVPLSSITFDG | CNEDELQ  | OTLRFSV | FTITLTLFLMAV | IFTRCRGICFV | WYKTI | TKKMI | DSHPQ |
| SAKERFALCO |     | DRYCVPPAFAGVPLSSITFDG | CNEDELQ  | OTLRFSV | FTITLTLFLMAV | IFTRCRGICFV | WYKTI | TKKMI | DSHPQ |
| WHITE-THRO |     | DRYCVPPAFARVPLSSITFDG | CNEDELQ  | OTLRFSV | FTITLTLFLMAV | IFTRCRGICFV | WYKTI | TKKMI | DSHPQ |
| CARMINEBEE |     | DRYCVPPAFAGVPLSSITFDG | CNEDELQ  | OTLRFSV | FTITLTLFLMAV | IFTRCRGICFV | WYKTI | TKKMI | DSHPQ |
| EMPERORPEN |     | DRYCVPPAFAGVPLSSITFDG | CNEDELQ  | OTLRFSV | FTITLTLFLMAV | IFTRCRGICFV | WYKTI | TKKMI | DSHPQ |
| ADELTEPENG |     | DRYCVPPAFAGVPLSSITFDG | CNEDELQ  | OTLRFSV | FTITLTLFLMAV | IFTRCRGICFV | WYKTI | TKKMI | DSHPQ |
| CRESTEIBI  |     | DRYCVPPAFAGVPLSSITFDG | CNEDELQ  | OTLRFSV | FTITLTLFLMAV | IFTRCRGICFV | WYKTI | TKKMI | DSHPQ |
| DALMATIANP |     | DRYCVPPAFAGVPLSSITFDG | CNEDELQ  | OTLRFSV | FTITLTLFLMAV | IFTRCRGICFV | WYKTI | TKKMI | DSHPQ |
| GREATCORMO |     | DRYCVPPAFAGVPLSSITFDG | CNEDELQ  | OTLRFSV | FTITLTLFLMAV | IFTRCRGICFV | WYKTI | TKKMI | DSHPQ |
| COMMONCUCK |     | DRYCVPPAFAGVPLSSITFDG | CNEDELQ  | OTLRFSV | FTITLTLFLMAV | IFTRCRGICFV | WYKTI | TKKMI | DSHPQ |
| NORTHERNFU |     | DRYCVPPAFAGVPLSSITFDG | CNEDELQ  | OTLRFSV | FTITLTLFLMAV | IFTRCRGICFV | WYKTI | TKKMI | DSHPQ |
| LITTELEGRE |     | DRYCVPPAFAGVPLSSITFDG | CNEDELQ  | OTLRFSV | FTITLTLFLMAV | IFTRCRGICFV | WYKTI | TKKMI | DSHPQ |
| COMMONOSTR |     | DRYCVPPAFAGVPLSSITFDG | CNEDELQ  | OTLRFSV | FTITLTLFLMAV | IFTRCRGICFV | WYKTI | TKKMI | DSHPQ |
| RED-LEGGED |     | DRYCVPPAFAGVPLSSITFDG | CNEDELQ  | OTLRFSV | FTITLTLFLMAV | IFTRCRGICFV | WYKTI | TKKMI | DSHPQ |
| RED-THROAT |     | DRYCVPPAFAGVPLSSITFDG | CNEDELQ  | OTLRFSV | FTITLTLFLMAV | IFTRCRGICFV | WYKTI | TKKMI | DSHPQ |
| BAR-TAILED |     | DRYCVPPAFAGVPLSSITFDG | CNEDELQ  | OTLRFSV | FTITLTLFLMAV | IFTRCRGICFV | WYKTI | TKKMI | DSHPQ |
| KILLDEER   |     | DRYCVPPAFAGVPLSSITFDG | CNEDELQ  | OTLRFSV | FTITLTLFLMAV | IFTRCRGICFV | WYKTI | TKKMI | DSHPQ |
| DOWNYWOODP |     | DRYCVPPAFAGVPLSSITFDG | CNEDELQ  | OTLRFSV | FTITLTLFLMAV | IFTRCRGICFV | WYKTI | TKKMI | DSHPQ |
| WHITE-TAIL |     | DRYCVPPAFAGVPLSSITFDG | CNEDELQ  | OTLRFSV | FTITLTLFLMAV | IFTRCRGICFV | WYKTI | TKKMI | DSHPQ |
| PISSHOCOM  |     | DRYCVPPAFAGVPLSSITFDG | CNEDELQ  | OTLRFSV | FTITLTLFLMAV | IFTRCRGICFV | WYKTI | TKKMI | DSHPQ |
| CUCKOOROLL |     | DRYCVPPAFAGVPLSSITFDG | CNEDELQ  | OTLRFSV | FTITLTLFLMAV | IFTRCRGICFV | WYKTI | TKKMI | DSHPQ |
| BARNOWL    |     | DRYCVPPAFAGVPLSSITFDG | CNEDELQ  | OTLRFSV | FTITLTLFLMAV | IFTRCRGICFV | WYKTI | TKKMI | DSHPQ |
| RED-CRESTE |     | DRYCVPPAFAGVPLSSITFDG | CNEDELQ  | OTLRFSV | FTITLTLFLMAV | IFTRCRGICFV | WYKTI | TKKMI | DSHPQ |
| KEA        |     | DRYCVPPAFAGVPLSSITFDG | CNEDELQ  | OTLRFSV | FTITLTLFLMAV | IFTRCRGICFV | WYKTI | TKKMI | DSHPQ |
| YELLOW-THR |     | DRYCVPPAFAGVPLSSITFDG | CNEDELQ  | OTLRFSV | FTITLTLFLMAV | IFTRCRGICFV | WYKTI | TKKMI | DSHPQ |
| MACQUEEN'S |     | DRYCVPPAFAGVPLSSITFDG | CNEDELQ  | OTLRFSV | FTITLTLFLMAV | IFTRCRGICFV | WYKTI | TKKMI | DSHPQ |
| RHINOCEROS |     | DRYCVPPAFAGVPLSSITFDG | CNEDELQ  | OTLRFSV | FTITLTLFLMAV | IFTRCRGICFV | WYKTI | TKKMI | DSHPQ |
| SUNBITTERN |     | DRYCVPPALAGVPLSSITFDG | CNEDELQ  | OTLRFSV | FTITLTLFLMAV | IFTRCRGICFV | WYKTI | TKKMI | DSHPQ |
| CHUCK-WILL |     | DRYCVPPALAGVPLSSITFDG | CNEDELQ  | OTLRFSV | FTITLTLFLMAV | IFTRCRGICFV | WYKTI | TKKMI | DSHPQ |
| BROWNRATE  |     | DRYCVPPAFAGVPLSSITFDG | CNEDELQ  | OTLRFSV | FTITLTLFLMAV | IFTRCRGICFV | WYKTI | TKKMI | DSHPQ |
| SPECKLEDMO |     | DRYCVPPALAGVPLSSITFDG | CNEDELQ  | OTLRFSV | FTITLTLFLMAV | IFTRCRGICFV | WYKTI | TKKMI | DSHPQ |
| WHITE-THRO |     | DRYCVPPAFARVPLSSITFDG | CNEDELQ  | OTLRFSV | FTITLTLFLMAV | IFTRCRGICFV | WYKTI | TKKMI | DSHPQ |
| WHITE-TAIL |     | DRYCVPPAFAGVPLSSITFDG | CNEDELQ  | OTLRFSV | FTITLTLFLMAV | IFTRCRGICFV | WYKTI | TKKMI | DSHPQ |
| EASTAFRICA |     | DRYCVPPAFAGVPLSSITFDG | CNEDELQ  | OTLRFSV | FTITLTLFLMAV | IFTRCRGICFV | WYKTI | TKKMI | DSHPQ |
| BALDEAGLE  |     | DRYCVPPAFAGVPLSSITFDG | CNEDELQ  | OTLRFSV | FTITLTLFLMAV | IFTRCRGICFV | WYKTI | TKKMI | DSHPQ |
| GOLDENEAGL |     | DRYCVPPAFAGVPLSSITFDG | CNEDELQ  | OTLRFSV | FTITLTLFLMAV | IFTRCRGICFV | WYKTI | TKKMI | DSHPQ |
| SWANGOOSE  |     | DRYCVPPALAGVPLSSITFDG | CNEDELQ  | OTLRFSV | FTITLTLFLMAV | IFTRCRGICFV | WYKTI | TKKMI | DSHPQ |
| TIBETANGRO |     | DRYCVPPAFAGVPLSSITFDG | CNEDELQ  | OTLRFSV | FTITLTLFLMAV | IFTRCRGICFV | WYKTI | TKKMI | DSHPQ |
| COMMONSTAR |     | DRYCVPPAFAGVPLSSITFDG | CNEDELQ  | OTLRFSV | FTITLTLFLMAV | IFTRCRGICFV | WYKTI | TKKMI | DSHPQ |
| RUFF       |     | DRYCVPPAFAGVPLSSITFDG | CNEDELQ  | OTLRFSV | FTITLTLFLMAV | IFTRCRGICFV | WYKTI | TKKMI | DSHPQ |
| GREATTIT   |     | DRYCVPPAFAGVPLSSITFDG | CNEDELQ  | OTLRFSV | FTITLTLFLMAV | IFTRCRGICFV | WYKTI | TKKMI | DSHPQ |
| JAPANESEQU |     | DRYCVPPALAGVPSSTITD   | CCDEDELQ | OTLRFSV | FTITLTLFLMAV | IFTRCRGICFV | WYKTI | TKKMI | DSHPQ |
| AMERICANCR |     | DRYCVPPAFAGVPLSSITFDG | CNEDELQ  | OTLRFSV | FTITLTLFLMAV | IFTRCRGICFV | WYKTI | TKKMI | DSHPQ |
| BLUB-CROWN |     | DRYCVPPAFAGVPLSSITFDG | CNEDELQ  | OTLRFSV | FTITLTLFLMAV | IFTRCRGICFV | WYKTI | TKKMI | DSHPQ |
| GOLDEN-COL |     | DRYCVPPAFAGVPLSSITFDG | CNEDELQ  | OTLRFSV | FTITLTLFLMAV | IFTRCRGICFV | WYKTI | TKKMI | DSHPQ |
| TURKEY     |     | DRYCVPPALAGVPSSTITD   | CCDEDELQ | OTLRFSV | FTITLTLFLMAV | IFTRCRGICFV | WYKTI | TKKMI | DSHPQ |
| HOODEDCROW |     | DRYCVPPAFAGVPLSSITFDG | CNEDELQ  | OTLRFSV | FTITLTLFLMAV | IFTRCRGICFV | WYKTI | TKKMI | DSHPQ |
| BENGALSEF  |     | DRYCVPPAFAGVPLSSITFDG | CNEDELQ  | OTLRFSV | FTITLTLFLMAV | IFTRCRGICFV | WYKTI | TKKMI | DSHPQ |
| BLUETIT    |     | DRYCVPPAFAGVPLSSITFDG | CNEDELQ  | OTLRFSV | FTITLTLFLMAV | IFTRCRGICFV | WYKTI | TKKMI | DSHPQ |

Supplementary Figure S3. Alignment of the transmembrane region and surrounding sequence of available avian TLR5 amino acid sequences. The conserved serine residue is highlighted in pink and any variant amino acids are highlighted in red.

**Supplementary Table S10.** Diversity statistics of Gentoo penguin (*Pygoscelis papua*) vs. avian Toll-like receptors from published studies. Chicken diversity data was drawn directly from Świderská, et al. (2018), while grey partridge study sequences were obtained from GenBank along with supplementary frequency data for analysis in DnaSP 6.12.10 as in main text methods to obtain comparable diversity measures.

| Gene        | Species          | Length (bp) | $k$   | $H_d \pm SD$      | $\pi \pm SD$          | UPV | A  |
|-------------|------------------|-------------|-------|-------------------|-----------------------|-----|----|
| <i>TLR4</i> | Gentoo penguin   | 2550        | 1.550 | $0.478 \pm 0.035$ | $0.00061 \pm 0.00005$ | 9   | 21 |
|             | Domestic chicken | 2532        | 6.540 | $0.947 \pm 0.010$ | $0.00258 \pm 0.00005$ | 24  | 70 |
|             | Grey partridge   | 2529        | 3.063 | $0.863 \pm 0.063$ | $0.00121 \pm 0.00018$ | 5   | 10 |
| <i>TLR5</i> | Gentoo penguin   | 2643        | 3.919 | $0.781 \pm 0.022$ | $0.00148 \pm 0.00006$ | 32  | 46 |
|             | Domestic chicken | 2586        | 2.866 | $0.854 \pm 0.013$ | $0.00111 \pm 0.00004$ | 10  | 22 |
|             | Grey partridge   | 2589-2592   | 1.053 | $0.747 \pm 0.076$ | $0.00041 \pm 0.00008$ | 4   | 6  |
| <i>TLR7</i> | Gentoo penguin   | 3126        | 0.327 | $0.296 \pm 0.034$ | $0.00010 \pm 0.00001$ | 8   | 10 |
|             | Domestic chicken | 3180        | 3.363 | $0.849 \pm 0.017$ | $0.00106 \pm 0.00005$ | 13  | 26 |
|             | Grey partridge   | 3141        | 1.753 | $0.532 \pm 0.100$ | $0.00056 \pm 0.00013$ | 3   | 3  |

$k$  = average number of nucleotide differences between alleles;  $H_d$  = haplotype diversity;  $SD$ : standard deviation;  $\pi$ : nucleotide diversity (average number of nucleotide differences per site between two sequences); UPV: number of unique protein variants; A: number of alleles.

Notes: To compare diversity levels in our study population with those of other species, we sought datasets that sequenced *TLR4*, *TLR5*, and *TLR7* in birds. Because diversity measures can be biased by gene length and whether sequenced fragments are under selection, we restricted our comparison only to studies that sequenced the full length of these genes: a study in 110 domestic chickens (*Gallus gallus domesticus*, Świderská, et al. 2018) and a study of 10 European grey partridges (*Perdix perdix*, Vinkler, et al. 2015). The difference in gene length among these species is minimal enough to allow comparison (*TLR4*: <0.01%, *TLR5*: 2.15%, *TLR7*: 1.69%). However, sampling strategy differs significantly between studies, and also affects diversity measures (i.e. chicken study sampled few individuals from 25 distinct farmed breeds, partridge study sampled a small geographic subset of the species, while Gentoo penguin study had varying numbers of samples from multiple wild populations). Given the differences in sampling strategy, only relative statements comparing TLRs within a species/study are appropriate, and care should be given to drawing conclusions from interspecific comparisons.

**Supplementary Table S11.** Sampling sites, location details, and number of samples obtained from Gentoo penguins for immunogenetic analysis.

| Sampling Site Name                                          | Region                      | Latitude  | Longitude | Sample size |             |             |             |
|-------------------------------------------------------------|-----------------------------|-----------|-----------|-------------|-------------|-------------|-------------|
|                                                             |                             |           |           | mtDNA       | <i>TLR4</i> | <i>TLR5</i> | <i>TLR7</i> |
| <b>Crozet Island (CR)</b>                                   | Crozet Is.                  | 46.4298 S | 50.4046 E | 7           | 7           | 7           | 7           |
| <b>Marion Island (MAR)</b>                                  | Prince Edward Is.           | 46.8872 S | 37.8671 E | 8           | 8           | 8           | 8           |
| <b>Courbet Peninsula (COU)</b>                              | Kerguelen Is.               | 49.2811 S | 70.5410 E | 2           | 7           | 7           | 7           |
| <b>Pointe du Morne (MO)</b>                                 | Kerguelen Is.               | 49.3805 S | 70.4423 E | 20          | 15          | 20          | 18          |
| <b>Cow Bay (CB)</b>                                         | Falkland/Malvinas Is.       | 51.4343 S | 57.8506 W | 16          | 19          | 18          | 17          |
| <b>Bull Roads (BR)</b>                                      | Falkland/Malvinas Is.       | 52.3380 S | 59.3633 W | 7           | 7           | 7           | 7           |
| <b>Bird Island (BI)</b>                                     | South Georgia               | 54.0094 S | 38.0631 W | 17          | 18          | 12          | 13          |
| <b>Martillo Island (MT)</b>                                 | Tierra del Fuego            | 54.9083 S | 67.3833 W | 5           | 5           | 5           | 4           |
| <b>Signy Island (SIG)</b>                                   | South Orkney Is.            | 60.6747 S | 45.6278 W | 5           | 5           | 5           | 5           |
| <b>Copacabana (Admiralty Bay), King George Island (COP)</b> | South Shetland Is.          | 62.1792 S | 58.4472 W | 21          | 22          | 21          | 21          |
| <b>Stranger Point, King George Island (SP)</b>              | South Shetland Is.          | 62.2375 S | 58.5939 W | 6           | 5           | 5           | 5           |
| <b>Bernardo O'Higgins Base (BO)</b>                         | Western Antarctic Peninsula | 63.3207 S | 57.8987 W | 0           | 6           | 6           | 6           |
| <b>Gabriel González Videla Base (GGV)</b>                   | Western Antarctic Peninsula | 64.8238 S | 62.8581 W | 0           | 7           | 7           | 7           |
| <b>Jougla Point (JP)</b>                                    | Western Antarctic Peninsula | 64.8270 S | 63.4932 W | 24          | 24          | 24          | 23          |
| <b>Total</b>                                                |                             |           |           | 138         | 155         | 152         | 148         |

**Supplementary Table S12.** List of primers used for PCR amplification and sequencing of Gentoo penguin TLR genes, along with reaction conditions.

| Gene               | Description <sup>1</sup> and (Primer Names)                                                  | Primer Sequences                                                                      | Ta (°C) | Product Size       | Polymerase / reaction volume / PCR program                                                                                                  |
|--------------------|----------------------------------------------------------------------------------------------|---------------------------------------------------------------------------------------|---------|--------------------|---------------------------------------------------------------------------------------------------------------------------------------------|
| <b><i>TLR4</i></b> | Exon 1<br>(PengTLR4_Ex1_F2 + PengTLR4_Ex1_R2_long)                                           | F: CTCACTCCAGGTCCTTGAGTG<br>R: ACTGCAGTACCCTCAGAGGT                                   | 55      | 419 bp             | Qiagen <i>Taq</i> PCR Master Mix Kit (12 µL)<br>94° C / 3:00<br>40 cycles:<br>94° C / 0:45<br>55° C / 0:45<br>72° C / 1:00<br>72° C / 10:00 |
| <b><i>TLR4</i></b> | Exon 2<br>(PengTLR4_Ex2_F2 + PengTLR4_Ex2_R1)                                                | F: TGCTGCTTTCTGACAGTGT<br>R: AGCCAAGACCAACAGACACC                                     | 55      | 358 bp             | Qiagen <i>Taq</i> PCR Master Mix Kit (12 µL)<br>94° C / 3:00<br>40 cycles:<br>94° C / 0:45<br>55° C / 0:45<br>72° C / 1:00<br>72° C / 10:00 |
| <b><i>TLR4</i></b> | Exon 3 (Start)<br>(PengTLR4_Ex3_Start_F + PengTLR4_Ex3_Start_R2)                             | F: AAGGGACAGTGTTCATGCA<br>R: CACTCAAATCTACAACCTCCAGG                                  | 55      | 945 bp             | Qiagen <i>Taq</i> PCR Master Mix Kit (12 µL)<br>94° C / 3:00<br>40 cycles:<br>94° C / 0:45<br>55° C / 1:00<br>72° C / 1:00<br>72° C / 10:00 |
| <b><i>TLR4</i></b> | Exon 3 (Middle)<br>(PengTLR4_Ex3_Mid_F1 + PengTLR4_Ex3_MidR2)                                | F: GGCAACGTCTCTAGTATTCGGT<br>R: TGCAGGTGTGTGGCATATCA                                  | 55      | 932 bp             | Qiagen <i>Taq</i> PCR Master Mix Kit (12 µL)<br>94° C / 3:00<br>40 cycles:<br>94° C / 0:45<br>55° C / 1:00<br>72° C / 1:00<br>72° C / 10:00 |
| <b><i>TLR4</i></b> | Exon 3 (End) <sup>2</sup><br>(PengTLR4_Ex3_Mid_F1 + PengTLR4_Ex3_EndR2 or PengTLR4_Ex3_EndR) | F: GGCAACGTCTCTAGTATTCGGT<br>R: TGCCTTCTAGCAGGACTCCT<br>or<br>R: ACTTCTGAGCACCAGCCATC | 50      | 1563 bp or 1671 bp | Qiagen <i>Taq</i> PCR Master Mix Kit (12 µL)<br>94° C / 3:00<br>40 cycles:                                                                  |

|             |                                                                  |                                                                 |    |         |                                                                                                                                                        |
|-------------|------------------------------------------------------------------|-----------------------------------------------------------------|----|---------|--------------------------------------------------------------------------------------------------------------------------------------------------------|
|             |                                                                  |                                                                 |    |         | 94° C / 0:45<br>50° C / 1:00<br>72° C / 2:00<br>72° C / 10:00                                                                                          |
| <b>TLR5</b> | TLR5 (A)<br>(TLR5_full_new_F +<br>TLR5_1000_R)                   | F:<br>AGTGTGACATTAGTCTTTTGTCTACA<br><br>R: AGCCAAATCCCGAACCCATT | 64 | 1021 bp | NEB Phusion Hot<br>Start Flex DNA<br>Polymerase (25 µL)<br>98° C / 3:00<br>40 cycles:<br>98° C / 0:30<br>64° C / 0:30<br>72° C / 1:00<br>72° C / 10:00 |
| <b>TLR5</b> | TLR5 (B)<br>(Gentoo_TLR5_sequencing_2_F<br>+ Gentoo_TLR5_full_R) | F: ACCTTAGTGACAACGGCTGG<br><br>R: GTGTTCATTCCTGCCATGGC          | 68 | 1948 bp | NEB Phusion Hot<br>Start Flex DNA<br>Polymerase (25 µL)<br>98° C / 3:00<br>40 cycles:<br>98° C / 0:30<br>68° C / 0:30<br>72° C / 2:00<br>72° C / 10:00 |
| <b>TLR5</b> | TLR5 (C)<br>(Gentoo_TLR5_sequencing_3_F<br>+ Gentoo_TLR5_full_R) | F: TCCCCTGAGCCTGAAGTCTT<br><br>R: GTGTTCATTCCTGCCATGGC          | 69 | 962 bp  | NEB Phusion Hot<br>Start Flex DNA<br>Polymerase (25 µL)<br>98° C / 3:00<br>40 cycles:<br>98° C / 0:30<br>69° C / 0:30<br>72° C / 1:00<br>72° C / 10:00 |
| <b>TLR7</b> | TLR7 Coding Exon (A)<br>(TLR7_StartF_212 +<br>TLR7_AR_882)       | F: AGCCAGTGTGAGAGACAGGA<br><br>R: ACGGTAGTAACAGTTCTGTC          | 62 | 670 bp  | NEB Phusion Hot<br>Start Flex DNA<br>Polymerase (25 µL)<br>98° C / 3:00<br>40 cycles:<br>98° C / 0:30<br>62° C / 0:30<br>72° C / 0:30<br>72° C / 10:00 |
| <b>TLR7</b> | TLR7 Coding Exon (B)<br>(TLR7_BF_832 +<br>TLR7_BR_1733)          | F: GAGCTAGGAAACATAGAAAT<br><br>R: TCATCATACCTGAAATAATG          | 55 | 901 bp  | NEB Phusion Hot<br>Start Flex DNA<br>Polymerase (25 µL)<br>98° C / 3:00<br>40 cycles:<br>98° C / 0:30                                                  |



|                                |                                                              |                          |    |         |                                                         |
|--------------------------------|--------------------------------------------------------------|--------------------------|----|---------|---------------------------------------------------------|
|                                |                                                              |                          |    |         | 55° C / 0:30                                            |
|                                |                                                              |                          |    |         | 72° C / 0:45                                            |
|                                |                                                              |                          |    |         | 72° C / 10:00                                           |
| <b><i>TLR7<sup>3</sup></i></b> | TLR7 Coding Exon (C)<br>(TLR7_midF_1512 +<br>TLR7_midR_2741) | F: AAATCTAACAGTGTGGATC   | 50 | 1229 bp | NEB Phusion Hot<br>Start Flex DNA<br>Polymerase (25 µL) |
|                                |                                                              | R: GTCACCTTGAGTCTGATTGAT |    |         | 98° C / 3:00                                            |
|                                |                                                              |                          |    |         | 40 cycles:                                              |
|                                |                                                              |                          |    |         | 98° C / 0:30                                            |
|                                |                                                              |                          |    |         | 50° C / 0:30                                            |
|                                |                                                              |                          |    |         | 72° C / 0:30                                            |
|                                |                                                              |                          |    |         | 72° C / 10:00                                           |
| <b><i>TLR7</i></b>             | TLR7 Coding Exon (D)<br>(TLR7_DF_2613 +<br>TLR7_End_DR_3597) | F: AATTAAGAAATCTAGCTTCC  | 54 | 984 bp  | NEB Phusion Hot<br>Start Flex DNA<br>Polymerase (25 µL) |
|                                |                                                              | R: TTTAGGGTACAATATCACAA  |    |         | 98° C / 3:00                                            |
|                                |                                                              |                          |    |         | 40 cycles:                                              |
|                                |                                                              |                          |    |         | 98° C / 0:30                                            |
|                                |                                                              |                          |    |         | 54° C / 0:45                                            |
|                                |                                                              |                          |    |         | 72° C / 0:30                                            |
|                                |                                                              |                          |    |         | 72° C / 10:00                                           |

<sup>1</sup> Longer exons are broken up into fragments due to the practical limitations of Sanger sequencing. Fragments are listed sequentially in the table, with sufficient overlaps to allow for sequence assembly. The descriptors Start/Middle/End or A/B/C/D also reflect this ordering of fragments of the gene.

<sup>2</sup> Certain samples yielded cleaner PCR amplicons and sequencing results with either of these two Reverse primers, so both are listed. PCRs were conducted under the same conditions for both combinations.

<sup>3</sup> This fragment was GC-rich and required Phusion GC buffer (NEB) rather than HF buffer for successful PCR amplification. The presence of a secondary structure here required repeat bi-directional sequencing for most samples.

## Supplementary Information References

- Adzhubei I, Jordan DM, Sunyaev SR. 2013. Predicting functional effect of human missense mutations using PolyPhen-2. *Current Protocols in Human Genetics* 76(1):7.20.1-7.20.41.
- Baylis AMM, Crofts S, Wolfaardt AC. 2013. Population trends of Gentoo Penguins *Pygoscelis papua* breeding at the Falkland Islands. *Marine Ornithology* 41: 1–5.
- Carvajal-Rodriguez A, de Uña-Alvarez J. 2011. Assessing Significance in High-Throughput Experiments by Sequential Goodness of Fit and q-Value Estimation. *PLoS One* 6:e24700.
- Crawford RJM, Dyer BM, Upfold L, Makhado AB. 2014. Congruent, decreasing trends of Gentoo Penguins and Crozet Shags at sub-Antarctic Marion Island suggest food limitation through common environmental forcing. *African Journal of Marine Science* 36: 225–231.
- Epstein CJ. 1967. Non-randomness of amino-acid changes in the evolution of homologous proteins. *Nature* 215(5099):355-359.
- Ghys MI, Raya Rey A, Schiavini A. 2008. Population trend and breeding biology of Gentoo penguin in Martillo Island, Tierra Del Fuego, Argentina. *Waterbirds* 31(4):625-631.
- Grantham R. 1974. Amino acid difference formula to help explain protein evolution, *Science*. 185(4154):862-864
- Gruerber CE, Wallis GP, Jamieson IG. 2014. Episodic Positive Selection in the Evolution of Avian Toll-Like Receptor Innate Immunity Genes. *Plos One* 9.
- Jouventin, P. 1994. Les populations d'oiseaux marins des T.A.A.F.: résumé de 20 années de recherche. *Alauda* 62: 44-47.
- Kimura M. 1980. A simple method for estimating evolutionary rates of base substitutions through comparative studies of nucleotide sequences. *Journal of Molecular Evolution* 16:111-120.
- Lescroel A, Bost CA. 2006. Recent decrease in Gentoo Penguin populations at Iles Kerguelen. *Antarctic Science* 18: 171-174.
- Lynch HL. 2013. The Gentoo Penguin (*Pygoscelis papua*). In: García Borboroglu PG, Boersma PD. (ed.), *Biology and Conservation of the World's penguins*, University of Washington Press, Seattle U.S.A.
- Miyata T. 1979. Two types of amino acid substitution in protein evolution. *Journal of Molecular Evolution*. 12(3):219-236
- Ng PC, Henikoff S. 2003. SIFT: Predicting amino acid changes that affect protein function. *Nucleic Acids Research* 31(13):3812-3814
- Sneath PHA. 1966. Relations between chemical structure and biological activity in peptides. *Journal of Theoretical Biology*. 12(2):157-195
- Song WS, Jeon YJ, Namgung B, Hong M, Yoon SI. 2017. A conserved TLR5 binding and activation hot spot on flagellin. *Scientific Reports* 7: 40878
- Šwidorská Z, Smidova A, Buchtova L, Bryjova A, Fabianova A, Munclinger P, Vinkler M. 2018. Avian Toll-like receptor allelic diversity far exceeds human polymorphism: an insight from domestic chicken breeds. *Scientific Reports* 8.
- Tamura K, Nei M. 1993. Estimation of the number of nucleotide substitutions in the control region of mitochondrial DNA in humans and chimpanzees. *Molecular Biology and Evolution* 10:512-526.
- Trathan PN, Daunt FHJ, Murphy EJ. 1996. *South Georgia: An Ecological Atlas*. British Antarctic Survey, Cambridge, UK.
- Urbina D, Tang B, Higgs PG. 2006. The response of amino acid frequencies to directional mutation pressure in mitochondrial genome sequences is related to the physical properties of the amino acids and to the structure of the genetic code. *Journal of Molecular Evolution* 62(3):340-361.
- Velová H, Gutowska-Ding MW, Burt DW, Vinkler M. 2018. Toll-Like Receptor Evolution in Birds: Gene Duplication, Pseudogenization, and Diversifying Selection. *Molecular Biology and Evolution* 35:2170-2184.
- Vinkler, M., Bainová, H., Bryjová, A. Tomášek, O, Albrecht, T, Bryja, J. 2015. Characterisation of Toll-like receptors 4, 5 and 7 and their genetic variation in the grey partridge. *Genetica* 143(1):101-112.

Weimerskirch H, Zotier R, Jouventin P. 1988. The avifauna of the Kerguelen islands. *Emu* 89: 15-29.

Weir BS, Cockerham CC. 1984. Estimating F-Statistics for the Analysis of Population Structure. *Evolution* 38:1358-1370.

Yang ZH. 2007. PAML 4: Phylogenetic analysis by maximum likelihood. *Mol Biol Evol* 24:1586-1591.

Yang ZH. 1997. PAML: a program package for phylogenetic analysis by maximum likelihood. *Computer Applications in the Biosciences* 13:555-556.

Yang ZH, Wong WSW, Nielsen R. 2005. Bayes empirical Bayes inference of amino acid sites under positive selection. *Mol Biol Evol* 22:1107-1118.

Yoon SI, Kurnasov O, Natarajan V, Hong M, Gudkov AV, Osterman AL, Wilson IA. 2012. Structural basis of TLR5-flagellin recognition and signaling. *Science* 335(6070):859-864.
